# Supplementary material for: A ligand-based approach for the in silico discovery of multi-target inhibitors for proteins associated with HIV infection
Source: Royal Society of Chemistry journal article supplement (doi:10.1039/c2mb25093d), 2012-05-07
Supplement: c2mb25093d.pdf [file c2mb25093d.pdf]

### Supplementary Information 2

| Name or Code  | PAHIV | A <sub>HIV-IP</sub> | Series     | Prob. | Pred-A <sub>HIV-IP</sub> |
|---------------|-------|---------------------|------------|-------|--------------------------|
| CHEMBL258205  | CCR2  | 1                   | Training   | 55.75 | 1                        |
| CHEMBL1090893 | CCR2  | 1                   | Prediction | 82.81 | 1                        |
| CHEMBL497202  | CCR2  | 1                   | Training   | 74.80 | 1                        |
| CHEMBL1092678 | CCR2  | 1                   | Training   | 87.39 | 1                        |
| CHEMBL230281  | CCR2  | 1                   | Training   | 99.17 | 1                        |
| CHEMBL256301  | CCR2  | 1                   | Prediction | 88.00 | 1                        |
| CHEMBL257191  | CCR2  | 1                   | Training   | 92.98 | 1                        |
| CHEMBL389771  | CCR2  | 1                   | Training   | 98.58 | 1                        |
| CHEMBL1092941 | CCR2  | 1                   | Training   | 96.07 | 1                        |
| CHEMBL1091604 | CCR2  | 1                   | Prediction | 70.12 | 1                        |
| CHEMBL495924  | CCR2  | 1                   | Training   | 50.34 | 1                        |
| CHEMBL1290636 | CCR2  | 1                   | Training   | 92.24 | 1                        |
| CHEMBL403889  | CCR2  | 1                   | Training   | 98.61 | 1                        |
| CHEMBL254772  | CCR2  | 1                   | Prediction | 99.73 | 1                        |
| CHEMBL404904  | CCR2  | 1                   | Training   | 98.70 | 1                        |
| CHEMBL1091605 | CCR2  | 1                   | Training   | 82.17 | 1                        |
| CHEMBL226066  | CCR2  | 1                   | Training   | 51.89 | 1                        |
| CHEMBL397749  | CCR2  | 1                   | Prediction | 98.91 | 1                        |
| CHEMBL229316  | CCR2  | 1                   | Training   | 81.42 | 1                        |
| CHEMBL502247  | CCR2  | 1                   | Training   | 82.40 | 1                        |
| CHEMBL502793  | CCR2  | 1                   | Training   | 77.57 | 1                        |
| CHEMBL397948  | CCR2  | 1                   | Prediction | 91.28 | 1                        |
| CHEMBL226065  | CCR2  | 1                   | Training   | 57.31 | 1                        |
| CHEMBL526752  | CCR2  | 1                   | Training   | 82.57 | 1                        |
| CHEMBL272369  | CCR2  | 1                   | Training   | 51.84 | 1                        |
| CHEMBL388487  | CCR2  | 1                   | Prediction | 91.28 | 1                        |
| CHEMBL397996  | CCR2  | 1                   | Training   | 94.77 | 1                        |
| CHEMBL230790  | CCR2  | 1                   | Training   | 99.02 | 1                        |
| CHEMBL496343  | CCR2  | 1                   | Training   | 57.73 | 1                        |
| CHEMBL402442  | CCR2  | 1                   | Prediction | 80.61 | 1                        |
| CHEMBL255302  | CCR2  | 1                   | Training   | 99.23 | 1                        |
| CHEMBL502516  | CCR2  | 1                   | Training   | 77.28 | 1                        |
| CHEMBL437552  | CCR2  | 1                   | Training   | 99.40 | 1                        |
| CHEMBL1289203 | CCR2  | 1                   | Prediction | 90.02 | 1                        |
| CHEMBL1289083 | CCR2  | 1                   | Training   | 85.71 | 1                        |
| CHEMBL505722  | CCR2  | 1                   | Training   | 95.50 | 1                        |
| CHEMBL481010  | CCR2  | 1                   | Training   | 61.90 | 1                        |
| CHEMBL387583  | CCR2  | 1                   | Prediction | 34.00 | 1                        |
| CHEMBL450231  | CCR2  | 1                   | Training   | 97.17 | 1                        |
| CHEMBL1681819 | CCR2  | 1                   | Training   | 98.77 | 1                        |
| CHEMBL1290637 | CCR2  | 1                   | Training   | 92.86 | 1                        |
| CHEMBL230166  | CCR2  | 1                   | Prediction | 99.17 | 1                        |

|               |      |   |            |       |   |
|---------------|------|---|------------|-------|---|
| CHEMBL388486  | CCR2 | 1 | Training   | 98.95 | 1 |
| CHEMBL438304  | CCR2 | 1 | Training   | 88.59 | 1 |
| CHEMBL1683074 | CCR2 | 1 | Training   | 91.84 | 1 |
| CHEMBL521275  | CCR2 | 1 | Prediction | 60.81 | 1 |
| CHEMBL1684712 | CCR2 | 1 | Training   | 98.54 | 1 |
| CHEMBL1683059 | CCR2 | 1 | Training   | 32.66 | 1 |
| CHEMBL256629  | CCR2 | 1 | Training   | 81.87 | 1 |
| CHEMBL1683190 | CCR2 | 1 | Prediction | 97.93 | 1 |
| CHEMBL1684706 | CCR2 | 1 | Training   | 99.16 | 1 |
| CHEMBL497788  | CCR2 | 1 | Training   | 55.31 | 1 |
| CHEMBL230684  | CCR2 | 1 | Training   | 95.25 | 1 |
| CHEMBL397997  | CCR2 | 1 | Prediction | 34.00 | 1 |
| CHEMBL1684694 | CCR2 | 1 | Training   | 98.77 | 1 |
| CHEMBL1092748 | CCR2 | 1 | Training   | 94.00 | 1 |
| CHEMBL496630  | CCR2 | 1 | Training   | 66.59 | 1 |
| CHEMBL502513  | CCR2 | 1 | Prediction | 93.55 | 1 |
| CHEMBL516224  | CCR2 | 1 | Training   | 71.74 | 1 |
| CHEMBL447937  | CCR2 | 1 | Training   | 99.56 | 1 |
| CHEMBL230794  | CCR2 | 1 | Training   | 97.82 | 1 |
| CHEMBL397747  | CCR2 | 1 | Prediction | 92.40 | 1 |
| CHEMBL441856  | CCR2 | 1 | Training   | 63.30 | 1 |
| CHEMBL255478  | CCR2 | 1 | Training   | 98.44 | 1 |
| CHEMBL257062  | CCR2 | 1 | Training   | 81.51 | 1 |
| CHEMBL1684702 | CCR2 | 1 | Prediction | 98.85 | 1 |
| CHEMBL526859  | CCR2 | 1 | Training   | 64.01 | 1 |
| CHEMBL1684713 | CCR2 | 1 | Training   | 97.67 | 1 |
| CHEMBL1782377 | CCR2 | 1 | Training   | 93.31 | 1 |
| CHEMBL1683063 | CCR2 | 1 | Prediction | 34.21 | 1 |
| CHEMBL402532  | CCR2 | 1 | Training   | 58.58 | 1 |
| CHEMBL495368  | CCR2 | 1 | Training   | 34.18 | 1 |
| CHEMBL481009  | CCR2 | 1 | Training   | 56.45 | 1 |
| CHEMBL1684683 | CCR2 | 1 | Prediction | 98.32 | 1 |
| CHEMBL391459  | CCR2 | 1 | Training   | 98.89 | 1 |
| CHEMBL1289316 | CCR2 | 1 | Training   | 74.76 | 1 |
| CHEMBL273083  | CCR2 | 1 | Training   | 95.25 | 1 |
| CHEMBL389888  | CCR2 | 1 | Prediction | 94.77 | 1 |
| CHEMBL270435  | CCR2 | 1 | Training   | 61.37 | 1 |
| CHEMBL492569  | CCR2 | 1 | Training   | 63.76 | 1 |
| CHEMBL522688  | CCR2 | 1 | Training   | 45.01 | 1 |
| CHEMBL1683067 | CCR2 | 1 | Prediction | 31.21 | 1 |
| CHEMBL388868  | CCR2 | 1 | Training   | 98.58 | 1 |
| CHEMBL499467  | CCR2 | 1 | Training   | 97.09 | 1 |
| CHEMBL255499  | CCR2 | 1 | Training   | 97.56 | 1 |
| CHEMBL257173  | CCR2 | 1 | Prediction | 92.80 | 1 |
| CHEMBL271725  | CCR2 | 1 | Training   | 78.57 | 1 |

|                |      |    |            |       |    |
|----------------|------|----|------------|-------|----|
| CHEMBL496959   | CCR2 | 1  | Training   | 58.32 | 1  |
| CHEMBL496344   | CCR2 | 1  | Training   | 64.80 | 1  |
| CHEMBL497577   | CCR2 | 1  | Prediction | 39.26 | 1  |
| CHEMBL388867   | CCR2 | 1  | Training   | 91.28 | 1  |
| CHEMBL452509   | CCR2 | 1  | Training   | 96.37 | 1  |
| CHEMBL257628   | CCR2 | 1  | Training   | 44.45 | 1  |
| CHEMBL495151   | CCR2 | 1  | Prediction | 51.77 | 1  |
| CHEMBL396517   | CCR2 | 1  | Training   | 85.32 | 1  |
| CHEMBL1782376  | CCR2 | 1  | Training   | 95.96 | 1  |
| CHEMBL395721   | CCR2 | 1  | Training   | 96.78 | 1  |
| CHEMBL1290412  | CCR2 | 1  | Prediction | 90.08 | 1  |
| CHEMBL226017   | CCR2 | 1  | Training   | 64.80 | 1  |
| CHEMBL480621   | CCR2 | 1  | Training   | 64.22 | 1  |
| CHEMBL494540   | CCR2 | 1  | Training   | 46.99 | 1  |
| CHEMBL526091   | CCR2 | 1  | Prediction | 57.49 | 1  |
| CHEMBL380258   | CCR2 | 1  | Training   | 42.15 | 1  |
| CHEMBL502795   | CCR2 | 1  | Training   | 95.85 | 1  |
| CHEMBL1782572  | CCR2 | 1  | Training   | 97.65 | 1  |
| CHEMBL451340   | CCR2 | 1  | Prediction | 84.04 | 1  |
| CHEMBL1684700  | CCR2 | 1  | Training   | 94.04 | 1  |
| CHEMBL449672   | CCR2 | 1  | Training   | 99.50 | 1  |
| CHEMBL1782573  | CCR2 | 1  | Training   | 84.79 | 1  |
| CHEMBL215020   | CCR2 | 1  | Prediction | 69.33 | 1  |
| CHEMBL257385   | CCR2 | 1  | Training   | 45.03 | 1  |
| CHEMBL271828   | CCR2 | 1  | Training   | 90.72 | 1  |
| CHEMBL438353   | CCR2 | 1  | Training   | 87.21 | 1  |
| CHEMBL230727   | CCR2 | 1  | Prediction | 98.24 | 1  |
| CHEMBL1782578  | CCR2 | 1  | Training   | 92.80 | 1  |
| CHEMBL481202   | CCR2 | 1  | Training   | 55.64 | 1  |
| CHEMBL209411   | CCR2 | 1  | Training   | 1.45  | 1  |
| CHEMBL403581   | CCR2 | 1  | Prediction | 93.04 | 1  |
| CHEMBL255500   | CCR2 | 1  | Training   | 97.03 | 1  |
| CHEMBL403250   | CCR2 | 1  | Training   | 61.57 | 1  |
| CHEMBL257768   | CCR2 | 1  | Training   | 98.44 | 1  |
| Aceclofenac    | CCR2 | -1 | Prediction | 96.27 | -1 |
| Acetaminophen  | CCR2 | -1 | Training   | 99.18 | -1 |
| Acetazolamide  | CCR2 | -1 | Training   | 84.62 | -1 |
| Acetophenazine | CCR2 | -1 | Training   | 42.52 | -1 |
| Amantadine     | CCR2 | -1 | Prediction | 96.75 | -1 |
| Ambenonium     | CCR2 | -1 | Training   | 37.65 | -1 |
| Amineptine     | CCR2 | -1 | Training   | 93.86 | -1 |
| Amiodarone     | CCR2 | -1 | Training   | 86.09 | -1 |
| Amitriptyline  | CCR2 | -1 | Prediction | 99.00 | -1 |
| Aprobarbital   | CCR2 | -1 | Training   | 97.50 | -1 |
| Artane         | CCR2 | -1 | Training   | 98.26 | -1 |

|                    |      |    |            |        |    |
|--------------------|------|----|------------|--------|----|
| Aspirin            | CCR2 | -1 | Training   | 99.38  | -1 |
| Atenolol           | CCR2 | -1 | Prediction | 98.78  | -1 |
| Atropine           | CCR2 | -1 | Training   | 76.97  | -1 |
| Baclofen           | CCR2 | -1 | Training   | 98.37  | -1 |
| Beclomethasone     | CCR2 | -1 | Training   | 99.66  | -1 |
| Benzonatate        | CCR2 | -1 | Prediction | 97.88  | -1 |
| Biperiden          | CCR2 | -1 | Training   | 96.77  | -1 |
| Bromocriptine      | CCR2 | -1 | Training   | 94.48  | -1 |
| Bucizine           | CCR2 | -1 | Training   | 62.09  | -1 |
| Budesonide         | CCR2 | -1 | Prediction | 88.90  | -1 |
| Buprenorphine      | CCR2 | -1 | Training   | 100.00 | -1 |
| Caffeine           | CCR2 | -1 | Training   | 71.94  | -1 |
| Cantil             | CCR2 | -1 | Training   | 97.87  | -1 |
| Carbachol          | CCR2 | -1 | Prediction | 93.39  | -1 |
| Carbamazepine      | CCR2 | -1 | Training   | 87.58  | -1 |
| Carisoprodol       | CCR2 | -1 | Training   | 78.02  | -1 |
| Carvedilol         | CCR2 | -1 | Training   | 99.22  | -1 |
| Cefoperazone       | CCR2 | -1 | Prediction | 0.54   | -1 |
| Chloral hydrate    | CCR2 | -1 | Training   | 99.20  | -1 |
| Chlordiazepoxide   | CCR2 | -1 | Training   | 92.53  | -1 |
| Chlorpropamide     | CCR2 | -1 | Training   | 79.22  | -1 |
| Chlorthalidone     | CCR2 | -1 | Prediction | 98.28  | -1 |
| Clidinium          | CCR2 | -1 | Training   | 96.79  | -1 |
| Clobazam           | CCR2 | -1 | Training   | 95.29  | -1 |
| Clofazimine        | CCR2 | -1 | Training   | 99.96  | -1 |
| Clomipramine       | CCR2 | -1 | Prediction | 93.23  | -1 |
| Clonidine          | CCR2 | -1 | Training   | 86.59  | -1 |
| Codeine            | CCR2 | -1 | Training   | 99.84  | -1 |
| Colchicine         | CCR2 | -1 | Training   | 99.12  | -1 |
| Cyclizine          | CCR2 | -1 | Prediction | 96.05  | -1 |
| Cyclosporin        | CCR2 | -1 | Training   | 0.02   | -1 |
| Dextropropoxyphene | CCR2 | -1 | Training   | 99.03  | -1 |
| Diazepam           | CCR2 | -1 | Training   | 94.85  | -1 |
| Diflucortolone     | CCR2 | -1 | Prediction | 82.23  | -1 |
| Dimercaprol        | CCR2 | -1 | Training   | 99.68  | -1 |
| Diphenhydramine    | CCR2 | -1 | Training   | 97.59  | -1 |
| Diphenidol         | CCR2 | -1 | Training   | 98.72  | -1 |
| Dobutamine         | CCR2 | -1 | Prediction | 95.82  | -1 |
| Dofetilide         | CCR2 | -1 | Training   | 70.70  | -1 |
| Domperidone        | CCR2 | -1 | Training   | 9.13   | -1 |
| Dopamine           | CCR2 | -1 | Training   | 99.41  | -1 |
| Doxazosin          | CCR2 | -1 | Prediction | 74.58  | -1 |
| Doxepin            | CCR2 | -1 | Training   | 99.57  | -1 |
| Dronabinol         | CCR2 | -1 | Training   | 99.12  | -1 |
| Droxicam           | CCR2 | -1 | Training   | 97.83  | -1 |

|                     |      |    |            |       |    |
|---------------------|------|----|------------|-------|----|
| Entacapone          | CCR2 | -1 | Prediction | 98.59 | -1 |
| Epinephrine         | CCR2 | -1 | Training   | 99.24 | -1 |
| Eprosartan          | CCR2 | -1 | Training   | 59.75 | -1 |
| Ergotamine          | CCR2 | -1 | Training   | 99.77 | -1 |
| Ethosuximide        | CCR2 | -1 | Prediction | 99.16 | -1 |
| Fentanyl            | CCR2 | -1 | Training   | 93.22 | -1 |
| Fexofenadine        | CCR2 | -1 | Training   | 94.61 | -1 |
| Flecainide          | CCR2 | -1 | Training   | 86.32 | -1 |
| Flunarizine         | CCR2 | -1 | Prediction | 22.01 | -1 |
| Flunisolide         | CCR2 | -1 | Training   | 85.88 | -1 |
| Fluoxetine          | CCR2 | -1 | Training   | 96.86 | -1 |
| Fluvoxamine         | CCR2 | -1 | Training   | 98.64 | -1 |
| Gabapentin          | CCR2 | -1 | Prediction | 99.13 | -1 |
| Gestodene           | CCR2 | -1 | Training   | 97.79 | -1 |
| Glutethimide        | CCR2 | -1 | Training   | 99.27 | -1 |
| Glycopyrrolate      | CCR2 | -1 | Training   | 86.00 | -1 |
| Guanadrel           | CCR2 | -1 | Prediction | 91.23 | -1 |
| Halofantrine        | CCR2 | -1 | Training   | 69.34 | -1 |
| Haloperidol         | CCR2 | -1 | Training   | 30.44 | -1 |
| Halothane           | CCR2 | -1 | Training   | 98.66 | -1 |
| Hydromorphone       | CCR2 | -1 | Prediction | 89.93 | -1 |
| Hydroxyzine         | CCR2 | -1 | Training   | 92.91 | -1 |
| Indapamide          | CCR2 | -1 | Training   | 88.42 | -1 |
| Indomethacin        | CCR2 | -1 | Training   | 97.22 | -1 |
| Isoetharine         | CCR2 | -1 | Prediction | 98.02 | -1 |
| Isoproterenol       | CCR2 | -1 | Training   | 98.67 | -1 |
| Isosorbide          | CCR2 | -1 | Training   | 98.75 | -1 |
| Ketamine            | CCR2 | -1 | Training   | 86.92 | -1 |
| Labetalol           | CCR2 | -1 | Prediction | 94.62 | -1 |
| Lacidipine          | CCR2 | -1 | Training   | 99.79 | -1 |
| Lamotrigine         | CCR2 | -1 | Training   | 38.38 | -1 |
| Leuprorelin         | CCR2 | -1 | Training   | 7.77  | -1 |
| Levodopa            | CCR2 | -1 | Prediction | 98.72 | -1 |
| Lidocaine           | CCR2 | -1 | Training   | 97.88 | -1 |
| Loratadine          | CCR2 | -1 | Training   | 56.56 | -1 |
| Maprotiline         | CCR2 | -1 | Training   | 99.25 | -1 |
| Meclizine           | CCR2 | -1 | Prediction | 78.37 | -1 |
| Medroxyprogesterone | CCR2 | -1 | Training   | 73.27 | -1 |
| Melfalan            | CCR2 | -1 | Training   | 97.27 | -1 |
| Meprobamate         | CCR2 | -1 | Training   | 87.05 | -1 |
| Methamphetamine     | CCR2 | -1 | Prediction | 99.20 | -1 |
| Methantheline       | CCR2 | -1 | Training   | 95.14 | -1 |
| Methocarbamol       | CCR2 | -1 | Training   | 99.03 | -1 |
| Methoxyflurane      | CCR2 | -1 | Training   | 99.04 | -1 |
| Methscopolamine     | CCR2 | -1 | Prediction | 75.54 | -1 |

|                 |      |    |            |       |    |
|-----------------|------|----|------------|-------|----|
| Methylphenidate | CCR2 | -1 | Training   | 98.92 | -1 |
| Methysergide    | CCR2 | -1 | Training   | 97.74 | -1 |
| Metoclopramide  | CCR2 | -1 | Training   | 98.58 | -1 |
| Midodrine       | CCR2 | -1 | Prediction | 99.69 | -1 |
| Mirtazapine     | CCR2 | -1 | Training   | 38.50 | -1 |
| Modafinil       | CCR2 | -1 | Training   | 96.14 | -1 |
| Montelukast     | CCR2 | -1 | Training   | 9.82  | 1* |
| Moricizine      | CCR2 | -1 | Prediction | 99.48 | -1 |
| Morphine        | CCR2 | -1 | Training   | 99.71 | -1 |
| Nalmefene       | CCR2 | -1 | Training   | 99.99 | -1 |
| Neostigmine     | CCR2 | -1 | Training   | 99.85 | -1 |
| Nifedipine      | CCR2 | -1 | Prediction | 99.89 | -1 |
| Oxycodone       | CCR2 | -1 | Training   | 99.81 | -1 |
| Paroxetine      | CCR2 | -1 | Training   | 95.40 | -1 |
| Pecazine        | CCR2 | -1 | Training   | 90.14 | -1 |
| Pergolide       | CCR2 | -1 | Prediction | 99.93 | -1 |
| Phenylbutazone  | CCR2 | -1 | Training   | 98.67 | -1 |
| Phenytoin       | CCR2 | -1 | Training   | 98.24 | -1 |
| Pilocarpine     | CCR2 | -1 | Training   | 75.12 | -1 |
| Pimozide        | CCR2 | -1 | Prediction | 2.02  | 1* |
| Pramipexole     | CCR2 | -1 | Training   | 96.19 | -1 |
| Probenecid      | CCR2 | -1 | Training   | 97.08 | -1 |
| Procyclidine    | CCR2 | -1 | Training   | 90.59 | -1 |
| Propranolol     | CCR2 | -1 | Prediction | 95.87 | -1 |
| Pseudoephedrine | CCR2 | -1 | Training   | 99.17 | -1 |
| Pyrantel        | CCR2 | -1 | Training   | 98.94 | -1 |
| Quinidine       | CCR2 | -1 | Training   | 39.65 | -1 |
| Ranitidine      | CCR2 | -1 | Prediction | 98.66 | -1 |
| Rifampin        | CCR2 | -1 | Training   | 61.30 | -1 |
| Risperidone     | CCR2 | -1 | Training   | 71.09 | -1 |
| Ropinirole      | CCR2 | -1 | Training   | 97.00 | -1 |
| Salmeterol      | CCR2 | -1 | Prediction | 95.57 | -1 |
| Selegiline      | CCR2 | -1 | Training   | 98.69 | -1 |
| Sulfinpyrazone  | CCR2 | -1 | Training   | 93.98 | -1 |
| Tegafur         | CCR2 | -1 | Training   | 62.47 | -1 |
| Terpin          | CCR2 | -1 | Prediction | 97.93 | -1 |
| Tolcapone       | CCR2 | -1 | Training   | 71.39 | -1 |
| Tranlycypromine | CCR2 | -1 | Training   | 98.96 | -1 |
| Trazodone       | CCR2 | -1 | Training   | 53.06 | -1 |
| Triamcinolone   | CCR2 | -1 | Prediction | 99.70 | -1 |
| Valproic acid   | CCR2 | -1 | Training   | 99.34 | -1 |
| Vancomycin      | CCR2 | -1 | Training   | 0.01  | -1 |
| Venlafaxine     | CCR2 | -1 | Training   | 98.95 | -1 |
| Verapamil       | CCR2 | -1 | Prediction | 99.66 | -1 |
| Wytensin        | CCR2 | -1 | Training   | 92.54 | -1 |

|              |      |    |            |        |    |
|--------------|------|----|------------|--------|----|
| Zafirlukast  | CCR2 | -1 | Training   | 96.89  | 1* |
| Zileuton     | CCR2 | -1 | Training   | 94.38  | -1 |
| Zonisamide   | CCR2 | -1 | Prediction | 95.96  | -1 |
| CHEMBL429323 | CCR3 | 1  | Training   | 99.10  | 1  |
| CHEMBL399495 | CCR3 | 1  | Training   | 99.52  | 1  |
| CHEMBL403838 | CCR3 | 1  | Prediction | 99.70  | 1  |
| CHEMBL217987 | CCR3 | 1  | Training   | 99.22  | 1  |
| CHEMBL257029 | CCR3 | 1  | Training   | 99.65  | 1  |
| CHEMBL402331 | CCR3 | 1  | Training   | 99.92  | 1  |
| CHEMBL404585 | CCR3 | 1  | Prediction | 99.80  | 1  |
| CHEMBL361369 | CCR3 | 1  | Training   | 98.17  | 1  |
| CHEMBL269933 | CCR3 | 1  | Training   | 99.58  | 1  |
| CHEMBL404586 | CCR3 | 1  | Training   | 99.71  | 1  |
| CHEMBL43423  | CCR3 | 1  | Prediction | 99.15  | 1  |
| CHEMBL362179 | CCR3 | 1  | Training   | 99.64  | 1  |
| CHEMBL386073 | CCR3 | 1  | Training   | 99.53  | 1  |
| CHEMBL404618 | CCR3 | 1  | Training   | 99.74  | 1  |
| CHEMBL270806 | CCR3 | 1  | Prediction | 99.97  | 1  |
| CHEMBL256068 | CCR3 | 1  | Training   | 99.54  | 1  |
| CHEMBL376737 | CCR3 | 1  | Training   | 99.99  | 1  |
| CHEMBL218568 | CCR3 | 1  | Training   | 99.41  | 1  |
| CHEMBL218262 | CCR3 | 1  | Prediction | 99.50  | 1  |
| CHEMBL401545 | CCR3 | 1  | Training   | 99.46  | 1  |
| CHEMBL270583 | CCR3 | 1  | Training   | 99.55  | 1  |
| CHEMBL257293 | CCR3 | 1  | Training   | 99.78  | 1  |
| CHEMBL363840 | CCR3 | 1  | Prediction | 99.76  | 1  |
| CHEMBL272068 | CCR3 | 1  | Training   | 99.61  | 1  |
| CHEMBL429846 | CCR3 | 1  | Training   | 96.33  | 1  |
| CHEMBL180746 | CCR3 | 1  | Training   | 99.39  | 1  |
| CHEMBL46404  | CCR3 | 1  | Prediction | 99.22  | 1  |
| CHEMBL257737 | CCR3 | 1  | Training   | 99.61  | 1  |
| CHEMBL258322 | CCR3 | 1  | Training   | 99.50  | 1  |
| CHEMBL257073 | CCR3 | 1  | Training   | 99.74  | 1  |
| CHEMBL384199 | CCR3 | 1  | Prediction | 99.46  | 1  |
| CHEMBL182086 | CCR3 | 1  | Training   | 99.61  | 1  |
| CHEMBL428775 | CCR3 | 1  | Training   | 99.44  | 1  |
| CHEMBL219048 | CCR3 | 1  | Training   | 91.35  | 1  |
| CHEMBL272067 | CCR3 | 1  | Prediction | 100.00 | 1  |
| CHEMBL257074 | CCR3 | 1  | Training   | 99.77  | 1  |
| CHEMBL444568 | CCR3 | 1  | Training   | 99.42  | 1  |
| CHEMBL270582 | CCR3 | 1  | Training   | 99.95  | 1  |
| CHEMBL178503 | CCR3 | 1  | Prediction | 99.74  | 1  |
| CHEMBL178230 | CCR3 | 1  | Training   | 99.42  | 1  |
| CHEMBL403839 | CCR3 | 1  | Training   | 99.94  | 1  |
| CHEMBL218174 | CCR3 | 1  | Training   | 93.79  | 1  |

|              |      |   |            |        |   |
|--------------|------|---|------------|--------|---|
| CHEMBL403331 | CCR3 | 1 | Prediction | 99.68  | 1 |
| CHEMBL270147 | CCR3 | 1 | Training   | 99.96  | 1 |
| CHEMBL178506 | CCR3 | 1 | Training   | 99.88  | 1 |
| CHEMBL258156 | CCR3 | 1 | Training   | 99.61  | 1 |
| CHEMBL402983 | CCR3 | 1 | Prediction | 99.72  | 1 |
| CHEMBL437031 | CCR3 | 1 | Training   | 99.69  | 1 |
| CHEMBL220765 | CCR3 | 1 | Training   | 99.50  | 1 |
| CHEMBL180042 | CCR3 | 1 | Training   | 99.47  | 1 |
| CHEMBL221067 | CCR3 | 1 | Prediction | 94.59  | 1 |
| CHEMBL427728 | CCR3 | 1 | Training   | 99.65  | 1 |
| CHEMBL441334 | CCR3 | 1 | Training   | 100.00 | 1 |
| CHEMBL250689 | CCR3 | 1 | Training   | 97.44  | 1 |
| CHEMBL178671 | CCR3 | 1 | Prediction | 99.62  | 1 |
| CHEMBL360039 | CCR3 | 1 | Training   | 99.47  | 1 |
| CHEMBL20921  | CCR3 | 1 | Training   | 28.30  | 1 |
| CHEMBL220713 | CCR3 | 1 | Training   | 99.52  | 1 |
| CHEMBL270146 | CCR3 | 1 | Prediction | 99.75  | 1 |
| CHEMBL220819 | CCR3 | 1 | Training   | 97.90  | 1 |
| CHEMBL46905  | CCR3 | 1 | Training   | 91.40  | 1 |
| CHEMBL429604 | CCR3 | 1 | Training   | 99.63  | 1 |
| CHEMBL404122 | CCR3 | 1 | Prediction | 99.75  | 1 |
| CHEMBL295415 | CCR3 | 1 | Training   | 99.93  | 1 |
| CHEMBL401879 | CCR3 | 1 | Training   | 99.97  | 1 |
| CHEMBL258309 | CCR3 | 1 | Training   | 99.54  | 1 |
| CHEMBL255399 | CCR3 | 1 | Prediction | 99.85  | 1 |
| CHEMBL255398 | CCR3 | 1 | Training   | 99.49  | 1 |
| CHEMBL361130 | CCR3 | 1 | Training   | 99.80  | 1 |
| CHEMBL180728 | CCR3 | 1 | Training   | 99.83  | 1 |
| CHEMBL180351 | CCR3 | 1 | Prediction | 99.89  | 1 |
| CHEMBL366710 | CCR3 | 1 | Training   | 99.42  | 1 |
| CHEMBL178287 | CCR3 | 1 | Training   | 98.21  | 1 |
| CHEMBL385607 | CCR3 | 1 | Training   | 99.62  | 1 |
| CHEMBL359609 | CCR3 | 1 | Prediction | 96.87  | 1 |
| CHEMBL383879 | CCR3 | 1 | Training   | 99.57  | 1 |
| CHEMBL258323 | CCR3 | 1 | Training   | 99.44  | 1 |
| CHEMBL221903 | CCR3 | 1 | Training   | 94.25  | 1 |
| CHEMBL428071 | CCR3 | 1 | Prediction | 99.56  | 1 |
| CHEMBL220766 | CCR3 | 1 | Training   | 99.92  | 1 |
| CHEMBL362490 | CCR3 | 1 | Training   | 99.08  | 1 |
| CHEMBL180229 | CCR3 | 1 | Training   | 98.83  | 1 |
| CHEMBL369331 | CCR3 | 1 | Prediction | 99.37  | 1 |
| CHEMBL384649 | CCR3 | 1 | Training   | 99.61  | 1 |
| CHEMBL404202 | CCR3 | 1 | Training   | 99.49  | 1 |
| CHEMBL181575 | CCR3 | 1 | Training   | 99.08  | 1 |
| CHEMBL218581 | CCR3 | 1 | Prediction | 65.51  | 1 |



|                |      |    |            |       |    |
|----------------|------|----|------------|-------|----|
| CHEMBL220801   | CCR3 | 1  | Training   | 93.38 | 1  |
| CHEMBL181528   | CCR3 | 1  | Training   | 99.44 | 1  |
| CHEMBL360529   | CCR3 | 1  | Training   | 97.90 | 1  |
| CHEMBL360062   | CCR3 | 1  | Prediction | 99.41 | 1  |
| CHEMBL386493   | CCR3 | 1  | Training   | 99.70 | 1  |
| CHEMBL180694   | CCR3 | 1  | Training   | 99.08 | 1  |
| CHEMBL178278   | CCR3 | 1  | Training   | 99.33 | 1  |
| CHEMBL362613   | CCR3 | 1  | Prediction | 99.16 | 1  |
| CHEMBL21143    | CCR3 | 1  | Training   | 19.65 | 1  |
| CHEMBL218997   | CCR3 | 1  | Training   | 94.26 | 1  |
| CHEMBL426422   | CCR3 | 1  | Training   | 99.23 | 1  |
| CHEMBL20532    | CCR3 | 1  | Prediction | 24.32 | 1  |
| CHEMBL182087   | CCR3 | 1  | Training   | 99.16 | 1  |
| CHEMBL266181   | CCR3 | 1  | Training   | 28.33 | 1  |
| CHEMBL180534   | CCR3 | 1  | Training   | 99.00 | 1  |
| CHEMBL282285   | CCR3 | 1  | Prediction | 16.95 | 1  |
| CHEMBL181302   | CCR3 | 1  | Training   | 99.12 | 1  |
| CHEMBL180860   | CCR3 | 1  | Training   | 95.48 | 1  |
| CHEMBL220800   | CCR3 | 1  | Training   | 94.72 | 1  |
| CHEMBL221901   | CCR3 | 1  | Prediction | 93.75 | 1  |
| CHEMBL181311   | CCR3 | 1  | Training   | 99.18 | 1  |
| CHEMBL20612    | CCR3 | 1  | Training   | 16.68 | 1  |
| CHEMBL360653   | CCR3 | 1  | Training   | 99.10 | 1  |
| CHEMBL180082   | CCR3 | 1  | Prediction | 98.38 | 1  |
| CHEMBL220866   | CCR3 | 1  | Training   | 94.26 | 1  |
| Aceclofenac    | CCR3 | -1 | Training   | 99.09 | -1 |
| Acetaminophen  | CCR3 | -1 | Training   | 99.81 | -1 |
| Acetazolamide  | CCR3 | -1 | Prediction | 95.88 | -1 |
| Acetophenazine | CCR3 | -1 | Training   | 75.80 | -1 |
| Amantadine     | CCR3 | -1 | Training   | 99.21 | -1 |
| Ambenonium     | CCR3 | -1 | Training   | 71.89 | -1 |
| Amineptine     | CCR3 | -1 | Prediction | 98.48 | -1 |
| Amiodarone     | CCR3 | -1 | Training   | 96.32 | -1 |
| Amitriptyline  | CCR3 | -1 | Training   | 99.76 | -1 |
| Aprobarbital   | CCR3 | -1 | Training   | 99.40 | -1 |
| Artane         | CCR3 | -1 | Prediction | 99.58 | -1 |
| Aspirin        | CCR3 | -1 | Training   | 99.85 | -1 |
| Atenolol       | CCR3 | -1 | Training   | 99.71 | -1 |
| Atropine       | CCR3 | -1 | Training   | 93.40 | -1 |
| Baclofen       | CCR3 | -1 | Prediction | 99.61 | -1 |
| Beclomethasone | CCR3 | -1 | Training   | 99.92 | -1 |
| Benzonatate    | CCR3 | -1 | Training   | 99.49 | -1 |
| Biperiden      | CCR3 | -1 | Training   | 99.22 | -1 |
| Bromocriptine  | CCR3 | -1 | Prediction | 98.64 | -1 |
| Bucizine       | CCR3 | -1 | Training   | 87.40 | -1 |

|                    |      |    |            |        |    |
|--------------------|------|----|------------|--------|----|
| Budesonide         | CCR3 | -1 | Training   | 97.14  | -1 |
| Buprenorphine      | CCR3 | -1 | Training   | 100.00 | -1 |
| Caffeine           | CCR3 | -1 | Prediction | 91.56  | -1 |
| Cantil             | CCR3 | -1 | Training   | 99.49  | -1 |
| Carbachol          | CCR3 | -1 | Training   | 98.36  | -1 |
| Carbamazepine      | CCR3 | -1 | Training   | 96.76  | -1 |
| Carisoprodol       | CCR3 | -1 | Prediction | 93.76  | -1 |
| Carvedilol         | CCR3 | -1 | Training   | 99.81  | -1 |
| Cefoperazone       | CCR3 | -1 | Training   | 2.24   | -1 |
| Chloral hydrate    | CCR3 | -1 | Training   | 99.81  | -1 |
| Chlordiazepoxide   | CCR3 | -1 | Prediction | 98.13  | -1 |
| Chlorpropamide     | CCR3 | -1 | Training   | 94.16  | -1 |
| Chlorthalidone     | CCR3 | -1 | Training   | 99.59  | -1 |
| Clidinium          | CCR3 | -1 | Training   | 99.22  | -1 |
| Clobazam           | CCR3 | -1 | Prediction | 98.85  | -1 |
| Clofazimine        | CCR3 | -1 | Training   | 99.99  | -1 |
| Clomipramine       | CCR3 | -1 | Training   | 98.31  | -1 |
| Clonidine          | CCR3 | -1 | Training   | 96.47  | -1 |
| Codeine            | CCR3 | -1 | Prediction | 99.96  | -1 |
| Colchicine         | CCR3 | -1 | Training   | 99.79  | -1 |
| Cyclizine          | CCR3 | -1 | Training   | 99.04  | -1 |
| Cyclosporin        | CCR3 | -1 | Training   | 0.08   | -1 |
| Dextropropoxyphene | CCR3 | -1 | Prediction | 99.77  | -1 |
| Diazepam           | CCR3 | -1 | Training   | 98.73  | -1 |
| Diflucortolone     | CCR3 | -1 | Training   | 95.15  | -1 |
| Dimercaprol        | CCR3 | -1 | Training   | 99.92  | -1 |
| Diphenhydramine    | CCR3 | -1 | Prediction | 99.42  | -1 |
| Diphenidol         | CCR3 | -1 | Training   | 99.69  | -1 |
| Dobutamine         | CCR3 | -1 | Training   | 98.98  | -1 |
| Dofetilide         | CCR3 | -1 | Training   | 91.08  | -1 |
| Domperidone        | CCR3 | -1 | Prediction | 29.85  | -1 |
| Dopamine           | CCR3 | -1 | Training   | 99.86  | -1 |
| Doxazosin          | CCR3 | -1 | Training   | 92.55  | -1 |
| Doxepin            | CCR3 | -1 | Training   | 99.90  | -1 |
| Dronabinol         | CCR3 | -1 | Prediction | 99.79  | -1 |
| Droxicam           | CCR3 | -1 | Training   | 99.48  | -1 |
| Entacapone         | CCR3 | -1 | Training   | 99.66  | -1 |
| Epinephrine        | CCR3 | -1 | Training   | 99.82  | -1 |
| Eprosartan         | CCR3 | -1 | Prediction | 86.28  | -1 |
| Ergotamine         | CCR3 | -1 | Training   | 99.95  | -1 |
| Ethosuximide       | CCR3 | -1 | Training   | 99.80  | -1 |
| Fentanyl           | CCR3 | -1 | Training   | 98.31  | -1 |
| Fexofenadine       | CCR3 | -1 | Prediction | 98.67  | -1 |
| Flecainide         | CCR3 | -1 | Training   | 96.39  | -1 |
| Flunarizine        | CCR3 | -1 | Training   | 54.44  | 1* |

|                     |      |    |            |       |    |
|---------------------|------|----|------------|-------|----|
| Flunisolide         | CCR3 | -1 | Training   | 96.26 | -1 |
| Fluoxetine          | CCR3 | -1 | Prediction | 99.24 | -1 |
| Fluvoxamine         | CCR3 | -1 | Training   | 99.68 | -1 |
| Gabapentin          | CCR3 | -1 | Training   | 99.79 | -1 |
| Gestodene           | CCR3 | -1 | Training   | 99.47 | -1 |
| Glutethimide        | CCR3 | -1 | Prediction | 99.83 | -1 |
| Glycopyrrolate      | CCR3 | -1 | Training   | 96.30 | -1 |
| Guanadrel           | CCR3 | -1 | Training   | 97.78 | -1 |
| Halofantrine        | CCR3 | -1 | Training   | 90.54 | -1 |
| Haloperidol         | CCR3 | -1 | Prediction | 64.95 | -1 |
| Halothane           | CCR3 | -1 | Training   | 99.68 | -1 |
| Hydromorphone       | CCR3 | -1 | Training   | 97.42 | -1 |
| Hydroxyzine         | CCR3 | -1 | Training   | 98.23 | -1 |
| Indapamide          | CCR3 | -1 | Prediction | 97.00 | -1 |
| Indomethacin        | CCR3 | -1 | Training   | 99.33 | -1 |
| Isoetharine         | CCR3 | -1 | Training   | 99.53 | -1 |
| Isoproterenol       | CCR3 | -1 | Training   | 99.68 | -1 |
| Isosorbide          | CCR3 | -1 | Prediction | 99.70 | -1 |
| Ketamine            | CCR3 | -1 | Training   | 96.57 | -1 |
| Labetalol           | CCR3 | -1 | Training   | 98.67 | -1 |
| Lacidipine          | CCR3 | -1 | Training   | 99.95 | -1 |
| Lamotrigine         | CCR3 | -1 | Prediction | 72.50 | -1 |
| Leuprorelin         | CCR3 | -1 | Training   | 26.30 | -1 |
| Levodopa            | CCR3 | -1 | Training   | 99.69 | -1 |
| Lidocaine           | CCR3 | -1 | Training   | 99.49 | -1 |
| Loratadine          | CCR3 | -1 | Prediction | 84.65 | -1 |
| Maprotiline         | CCR3 | -1 | Training   | 99.82 | -1 |
| Meclizine           | CCR3 | -1 | Training   | 93.88 | -1 |
| Medroxyprogesterone | CCR3 | -1 | Training   | 92.07 | -1 |
| Melfalan            | CCR3 | -1 | Prediction | 99.34 | -1 |
| Meprobamate         | CCR3 | -1 | Training   | 96.61 | -1 |
| Methamphetamine     | CCR3 | -1 | Training   | 99.81 | -1 |
| Methantheline       | CCR3 | -1 | Training   | 98.81 | -1 |
| Methocarbamol       | CCR3 | -1 | Prediction | 99.77 | -1 |
| Methoxyflurane      | CCR3 | -1 | Training   | 99.77 | -1 |
| Methscopolamine     | CCR3 | -1 | Training   | 92.89 | -1 |
| Methylphenidate     | CCR3 | -1 | Training   | 99.74 | -1 |
| Methysergide        | CCR3 | -1 | Prediction | 99.46 | -1 |
| Metoclopramide      | CCR3 | -1 | Training   | 99.66 | -1 |
| Midodrine           | CCR3 | -1 | Training   | 99.93 | -1 |
| Mirtazapine         | CCR3 | -1 | Training   | 72.61 | -1 |
| Modafinil           | CCR3 | -1 | Prediction | 99.06 | -1 |
| Montelukast         | CCR3 | -1 | Training   | 31.55 | -1 |
| Moricizine          | CCR3 | -1 | Training   | 99.88 | -1 |
| Morphine            | CCR3 | -1 | Training   | 99.93 | -1 |

|                 |      |    |            |        |    |
|-----------------|------|----|------------|--------|----|
| Nalmefene       | CCR3 | -1 | Prediction | 100.00 | -1 |
| Neostigmine     | CCR3 | -1 | Training   | 99.96  | -1 |
| Nifedipine      | CCR3 | -1 | Training   | 99.97  | -1 |
| Oxycodone       | CCR3 | -1 | Training   | 99.96  | -1 |
| Paroxetine      | CCR3 | -1 | Prediction | 98.87  | -1 |
| Pecazine        | CCR3 | -1 | Training   | 97.48  | -1 |
| Pergolide       | CCR3 | -1 | Training   | 99.98  | -1 |
| Phenylbutazone  | CCR3 | -1 | Training   | 99.68  | -1 |
| Phenytoin       | CCR3 | -1 | Prediction | 99.58  | -1 |
| Pilocarpine     | CCR3 | -1 | Training   | 92.75  | -1 |
| Pimozide        | CCR3 | -1 | Training   | 8.03   | -1 |
| Pramipexole     | CCR3 | -1 | Training   | 99.07  | -1 |
| Probenecid      | CCR3 | -1 | Prediction | 99.29  | -1 |
| Procyclidine    | CCR3 | -1 | Training   | 97.61  | -1 |
| Propantheline   | CCR3 | -1 | Training   | 98.99  | -1 |
| Pseudoephedrine | CCR3 | -1 | Training   | 99.80  | -1 |
| Pyrantel        | CCR3 | -1 | Prediction | 99.75  | -1 |
| Quinidine       | CCR3 | -1 | Training   | 73.56  | -1 |
| Ranitidine      | CCR3 | -1 | Training   | 99.68  | -1 |
| Rifampin        | CCR3 | -1 | Training   | 87.02  | -1 |
| Risperidone     | CCR3 | -1 | Prediction | 91.24  | -1 |
| Ropinirole      | CCR3 | -1 | Training   | 99.27  | -1 |
| Salmeterol      | CCR3 | -1 | Training   | 98.92  | -1 |
| Selegiline      | CCR3 | -1 | Training   | 99.69  | -1 |
| Sulfinpyrazone  | CCR3 | -1 | Prediction | 98.51  | -1 |
| Tegafur         | CCR3 | -1 | Training   | 87.57  | -1 |
| Terpin          | CCR3 | -1 | Training   | 99.50  | -1 |
| Tolcapone       | CCR3 | -1 | Training   | 91.35  | -1 |
| Tranlycypromine | CCR3 | -1 | Prediction | 99.75  | -1 |
| Trazodone       | CCR3 | -1 | Training   | 82.72  | -1 |
| Triamcinolone   | CCR3 | -1 | Training   | 99.93  | -1 |
| Valproic acid   | CCR3 | -1 | Training   | 99.84  | -1 |
| Vancomycin      | CCR3 | -1 | Prediction | 0.05   | -1 |
| Venlafaxine     | CCR3 | -1 | Training   | 99.75  | -1 |
| Verapamil       | CCR3 | -1 | Training   | 99.92  | -1 |
| Wytensin        | CCR3 | -1 | Training   | 98.13  | -1 |
| Zafirlukast     | CCR3 | -1 | Prediction | 99.25  | -1 |
| Zileuton        | CCR3 | -1 | Training   | 98.61  | -1 |
| Zonisamide      | CCR3 | -1 | Training   | 99.02  | -1 |
| CHEMBL515193    | CCR5 | 1  | Prediction | 92.78  | 1  |
| CHEMBL460845    | CCR5 | 1  | Training   | 64.89  | 1  |
| CHEMBL21106     | CCR5 | 1  | Training   | 99.76  | 1  |
| CHEMBL457043    | CCR5 | 1  | Training   | 69.96  | 1  |
| CHEMBL20896     | CCR5 | 1  | Prediction | 88.97  | 1  |
| CHEMBL320386    | CCR5 | 1  | Training   | 85.92  | 1  |

|               |      |   |            |       |     |
|---------------|------|---|------------|-------|-----|
| CHEMBL316475  | CCR5 | 1 | Training   | 89.19 | 1   |
| CHEMBL20345   | CCR5 | 1 | Training   | 99.67 | 1   |
| CHEMBL473558  | CCR5 | 1 | Prediction | 88.42 | 1   |
| CHEMBL461687  | CCR5 | 1 | Training   | 82.22 | 1   |
| CHEMBL319593  | CCR5 | 1 | Training   | 99.83 | 1   |
| CHEMBL322422  | CCR5 | 1 | Training   | 99.84 | 1   |
| CHEMBL99909   | CCR5 | 1 | Prediction | 86.47 | 1   |
| CHEMBL1201187 | CCR5 | 1 | Training   | 99.62 | 1   |
| CHEMBL21147   | CCR5 | 1 | Training   | 99.38 | 1   |
| CHEMBL20622   | CCR5 | 1 | Training   | 98.69 | 1   |
| CHEMBL212731  | CCR5 | 1 | Prediction | 94.48 | 1   |
| CHEMBL520091  | CCR5 | 1 | Training   | 99.61 | 1   |
| CHEMBL511493  | CCR5 | 1 | Training   | 99.60 | 1   |
| CHEMBL480503  | CCR5 | 1 | Training   | 99.55 | 1   |
| CHEMBL317710  | CCR5 | 1 | Prediction | 82.01 | -1* |
| CHEMBL194497  | CCR5 | 1 | Training   | 99.98 | 1   |
| CHEMBL21117   | CCR5 | 1 | Training   | 99.76 | 1   |
| CHEMBL455073  | CCR5 | 1 | Training   | 98.85 | 1   |
| CHEMBL212689  | CCR5 | 1 | Prediction | 98.92 | 1   |
| CHEMBL459384  | CCR5 | 1 | Training   | 53.99 | 1   |
| CHEMBL480693  | CCR5 | 1 | Training   | 99.18 | 1   |
| CHEMBL193984  | CCR5 | 1 | Training   | 99.94 | 1   |
| CHEMBL489513  | CCR5 | 1 | Prediction | 93.89 | 1   |
| CHEMBL103790  | CCR5 | 1 | Training   | 99.72 | 1   |
| CHEMBL20453   | CCR5 | 1 | Training   | 99.66 | 1   |
| CHEMBL464132  | CCR5 | 1 | Training   | 99.85 | 1   |
| CHEMBL371584  | CCR5 | 1 | Prediction | 99.47 | 1   |
| CHEMBL456226  | CCR5 | 1 | Training   | 70.67 | 1   |
| CHEMBL491319  | CCR5 | 1 | Training   | 93.89 | 1   |
| CHEMBL371177  | CCR5 | 1 | Training   | 99.96 | 1   |
| CHEMBL471920  | CCR5 | 1 | Prediction | 99.62 | 1   |
| CHEMBL472464  | CCR5 | 1 | Training   | 45.59 | 1   |
| CHEMBL278085  | CCR5 | 1 | Training   | 97.78 | 1   |
| CHEMBL513564  | CCR5 | 1 | Training   | 99.24 | 1   |
| CHEMBL473759  | CCR5 | 1 | Prediction | 89.39 | 1   |
| CHEMBL500631  | CCR5 | 1 | Training   | 98.82 | 1   |
| CHEMBL195753  | CCR5 | 1 | Training   | 99.97 | 1   |
| CHEMBL472412  | CCR5 | 1 | Training   | 98.91 | 1   |
| CHEMBL520755  | CCR5 | 1 | Prediction | 99.71 | 1   |
| CHEMBL377914  | CCR5 | 1 | Training   | 66.73 | 1   |
| CHEMBL318406  | CCR5 | 1 | Training   | 80.76 | 1   |
| CHEMBL211866  | CCR5 | 1 | Training   | 75.84 | 1   |
| CHEMBL471251  | CCR5 | 1 | Prediction | 98.18 | 1   |
| CHEMBL193822  | CCR5 | 1 | Training   | 99.97 | 1   |
| CHEMBL328297  | CCR5 | 1 | Training   | 99.00 | 1   |

|               |      |   |            |        |   |
|---------------|------|---|------------|--------|---|
| CHEMBL471909  | CCR5 | 1 | Training   | 99.48  | 1 |
| CHEMBL172854  | CCR5 | 1 | Prediction | 99.52  | 1 |
| CHEMBL281607  | CCR5 | 1 | Training   | 99.59  | 1 |
| CHEMBL101961  | CCR5 | 1 | Training   | 83.14  | 1 |
| CHEMBL511634  | CCR5 | 1 | Training   | 95.50  | 1 |
| CHEMBL435886  | CCR5 | 1 | Prediction | 99.97  | 1 |
| CHEMBL193440  | CCR5 | 1 | Training   | 97.59  | 1 |
| CHEMBL193988  | CCR5 | 1 | Training   | 99.94  | 1 |
| CHEMBL449758  | CCR5 | 1 | Training   | 96.34  | 1 |
| CHEMBL435727  | CCR5 | 1 | Prediction | 99.51  | 1 |
| CHEMBL470510  | CCR5 | 1 | Training   | 99.59  | 1 |
| CHEMBL461690  | CCR5 | 1 | Training   | 78.70  | 1 |
| CHEMBL379082  | CCR5 | 1 | Training   | 84.44  | 1 |
| CHEMBL420465  | CCR5 | 1 | Prediction | 99.86  | 1 |
| CHEMBL93139   | CCR5 | 1 | Training   | 87.04  | 1 |
| CHEMBL196497  | CCR5 | 1 | Training   | 100.00 | 1 |
| CHEMBL471623  | CCR5 | 1 | Training   | 86.23  | 1 |
| CHEMBL481068  | CCR5 | 1 | Prediction | 98.74  | 1 |
| CHEMBL480890  | CCR5 | 1 | Training   | 97.07  | 1 |
| CHEMBL99788   | CCR5 | 1 | Training   | 78.62  | 1 |
| CHEMBL198758  | CCR5 | 1 | Training   | 99.01  | 1 |
| CHEMBL382435  | CCR5 | 1 | Prediction | 96.66  | 1 |
| CHEMBL207182  | CCR5 | 1 | Training   | 85.67  | 1 |
| CHEMBL471542  | CCR5 | 1 | Training   | 95.51  | 1 |
| CHEMBL175327  | CCR5 | 1 | Training   | 99.71  | 1 |
| CHEMBL173095  | CCR5 | 1 | Prediction | 99.70  | 1 |
| CHEMBL353331  | CCR5 | 1 | Training   | 98.17  | 1 |
| CHEMBL481080  | CCR5 | 1 | Training   | 97.79  | 1 |
| CHEMBL1222769 | CCR5 | 1 | Training   | 99.55  | 1 |
| CHEMBL455570  | CCR5 | 1 | Prediction | 99.63  | 1 |
| CHEMBL174304  | CCR5 | 1 | Training   | 99.41  | 1 |
| CHEMBL481274  | CCR5 | 1 | Training   | 99.06  | 1 |
| CHEMBL283788  | CCR5 | 1 | Training   | 99.61  | 1 |
| CHEMBL457044  | CCR5 | 1 | Prediction | 53.52  | 1 |
| CHEMBL20598   | CCR5 | 1 | Training   | 99.63  | 1 |
| CHEMBL480504  | CCR5 | 1 | Training   | 99.20  | 1 |
| CHEMBL352514  | CCR5 | 1 | Training   | 97.89  | 1 |
| CHEMBL380447  | CCR5 | 1 | Prediction | 76.52  | 1 |
| CHEMBL198150  | CCR5 | 1 | Training   | 75.84  | 1 |
| CHEMBL207630  | CCR5 | 1 | Training   | 99.64  | 1 |
| CHEMBL437494  | CCR5 | 1 | Training   | 88.44  | 1 |
| CHEMBL204743  | CCR5 | 1 | Prediction | 99.38  | 1 |
| CHEMBL428104  | CCR5 | 1 | Training   | 100.00 | 1 |
| CHEMBL204821  | CCR5 | 1 | Training   | 82.19  | 1 |
| CHEMBL179141  | CCR5 | 1 | Training   | 96.68  | 1 |

|                |      |    |            |       |     |
|----------------|------|----|------------|-------|-----|
| CHEMBL179209   | CCR5 | 1  | Prediction | 98.53 | 1   |
| CHEMBL85086    | CCR5 | 1  | Training   | 74.25 | 1   |
| CHEMBL214818   | CCR5 | 1  | Training   | 94.53 | -1* |
| CHEMBL320149   | CCR5 | 1  | Training   | 91.79 | 1   |
| CHEMBL469724   | CCR5 | 1  | Prediction | 87.96 | 1   |
| CHEMBL318210   | CCR5 | 1  | Training   | 80.27 | 1   |
| CHEMBL511494   | CCR5 | 1  | Training   | 99.55 | 1   |
| CHEMBL499483   | CCR5 | 1  | Training   | 97.52 | 1   |
| CHEMBL202814   | CCR5 | 1  | Prediction | 66.59 | 1   |
| CHEMBL207487   | CCR5 | 1  | Training   | 89.58 | 1   |
| CHEMBL172659   | CCR5 | 1  | Training   | 98.04 | 1   |
| CHEMBL197641   | CCR5 | 1  | Training   | 76.47 | 1   |
| CHEMBL366626   | CCR5 | 1  | Prediction | 98.43 | 1   |
| CHEMBL457960   | CCR5 | 1  | Training   | 64.32 | 1   |
| CHEMBL203536   | CCR5 | 1  | Training   | 75.78 | 1   |
| CHEMBL364070   | CCR5 | 1  | Training   | 96.07 | 1   |
| CHEMBL193972   | CCR5 | 1  | Prediction | 97.36 | 1   |
| CHEMBL382252   | CCR5 | 1  | Training   | 82.10 | 1   |
| CHEMBL436290   | CCR5 | 1  | Training   | 99.84 | 1   |
| CHEMBL205539   | CCR5 | 1  | Training   | 82.32 | 1   |
| CHEMBL1172035  | CCR5 | 1  | Prediction | 94.96 | 1   |
| CHEMBL1222771  | CCR5 | 1  | Training   | 97.13 | 1   |
| CHEMBL318909   | CCR5 | 1  | Training   | 89.86 | 1   |
| CHEMBL193678   | CCR5 | 1  | Training   | 99.97 | 1   |
| CHEMBL366536   | CCR5 | 1  | Prediction | 98.45 | -1* |
| CHEMBL102675   | CCR5 | 1  | Training   | 73.56 | 1   |
| CHEMBL472260   | CCR5 | 1  | Training   | 53.12 | 1   |
| CHEMBL475606   | CCR5 | 1  | Training   | 99.99 | 1   |
| CHEMBL368265   | CCR5 | 1  | Prediction | 99.63 | 1   |
| CHEMBL318681   | CCR5 | 1  | Training   | 85.74 | 1   |
| CHEMBL82301    | CCR5 | 1  | Training   | 94.43 | 1   |
| Aceclofenac    | CCR5 | -1 | Training   | 97.33 | -1  |
| Acetaminophen  | CCR5 | -1 | Prediction | 99.42 | -1  |
| Acetazolamide  | CCR5 | -1 | Training   | 88.59 | -1  |
| Acetophenazine | CCR5 | -1 | Training   | 51.08 | -1  |
| Amantadine     | CCR5 | -1 | Training   | 97.68 | -1  |
| Ambenonium     | CCR5 | -1 | Prediction | 46.02 | -1  |
| Amineptine     | CCR5 | -1 | Training   | 95.57 | -1  |
| Amiodarone     | CCR5 | -1 | Training   | 89.73 | -1  |
| Amitriptyline  | CCR5 | -1 | Training   | 99.29 | -1  |
| Aprobarbital   | CCR5 | -1 | Prediction | 98.22 | -1  |
| Artane         | CCR5 | -1 | Training   | 98.76 | -1  |
| Aspirin        | CCR5 | -1 | Training   | 99.56 | -1  |
| Atenolol       | CCR5 | -1 | Training   | 99.14 | -1  |
| Atropine       | CCR5 | -1 | Prediction | 82.51 | -1  |

|                    |      |    |            |        |    |
|--------------------|------|----|------------|--------|----|
| Baclofen           | CCR5 | -1 | Training   | 98.84  | -1 |
| Beclomethasone     | CCR5 | -1 | Training   | 99.76  | -1 |
| Benzonatate        | CCR5 | -1 | Training   | 98.49  | -1 |
| Biperiden          | CCR5 | -1 | Prediction | 97.69  | -1 |
| Bromocriptine      | CCR5 | -1 | Training   | 96.03  | -1 |
| Bucizine           | CCR5 | -1 | Training   | 69.81  | -1 |
| Budesonide         | CCR5 | -1 | Training   | 91.87  | -1 |
| Buprenorphine      | CCR5 | -1 | Prediction | 100.00 | -1 |
| Caffeine           | CCR5 | -1 | Training   | 78.35  | -1 |
| Cantil             | CCR5 | -1 | Training   | 98.48  | -1 |
| Carbachol          | CCR5 | -1 | Training   | 95.23  | -1 |
| Carbamazepine      | CCR5 | -1 | Prediction | 90.87  | -1 |
| Carisoprodol       | CCR5 | -1 | Training   | 83.36  | -1 |
| Carvedilol         | CCR5 | -1 | Training   | 99.44  | -1 |
| Cefoperazone       | CCR5 | -1 | Training   | 0.76   | -1 |
| Chloral hydrate    | CCR5 | -1 | Prediction | 99.43  | -1 |
| Chlordiazepoxide   | CCR5 | -1 | Training   | 94.59  | -1 |
| Chlorpropamide     | CCR5 | -1 | Training   | 84.33  | -1 |
| Chlorthalidone     | CCR5 | -1 | Training   | 98.78  | -1 |
| Clidinium          | CCR5 | -1 | Prediction | 97.71  | -1 |
| Clobazam           | CCR5 | -1 | Training   | 96.62  | -1 |
| Clofazimine        | CCR5 | -1 | Training   | 99.97  | -1 |
| Clomipramine       | CCR5 | -1 | Training   | 95.11  | -1 |
| Clonidine          | CCR5 | -1 | Prediction | 90.12  | -1 |
| Codeine            | CCR5 | -1 | Training   | 99.89  | -1 |
| Colchicine         | CCR5 | -1 | Training   | 99.37  | -1 |
| Cyclizine          | CCR5 | -1 | Training   | 97.17  | -1 |
| Cyclosporin        | CCR5 | -1 | Prediction | 0.03   | -1 |
| Dextropropoxyphene | CCR5 | -1 | Training   | 99.31  | -1 |
| Diazepam           | CCR5 | -1 | Training   | 96.30  | -1 |
| Diflucortolone     | CCR5 | -1 | Training   | 86.73  | -1 |
| Dimercaprol        | CCR5 | -1 | Prediction | 99.77  | -1 |
| Diphenhydramine    | CCR5 | -1 | Training   | 98.28  | -1 |
| Diphenidol         | CCR5 | -1 | Training   | 99.09  | -1 |
| Dobutamine         | CCR5 | -1 | Training   | 97.00  | -1 |
| Dofetilide         | CCR5 | -1 | Prediction | 77.30  | -1 |
| Domperidone        | CCR5 | -1 | Training   | 12.42  | -1 |
| Dopamine           | CCR5 | -1 | Training   | 99.58  | -1 |
| Doxazosin          | CCR5 | -1 | Training   | 80.55  | -1 |
| Doxepin            | CCR5 | -1 | Prediction | 99.70  | -1 |
| Dronabinol         | CCR5 | -1 | Training   | 99.38  | -1 |
| Droxycam           | CCR5 | -1 | Training   | 98.45  | -1 |
| Entacapone         | CCR5 | -1 | Training   | 98.99  | -1 |
| Epinephrine        | CCR5 | -1 | Prediction | 99.46  | -1 |
| Eprosartan         | CCR5 | -1 | Training   | 67.70  | -1 |



|                     |      |    |            |       |    |
|---------------------|------|----|------------|-------|----|
| Ergotamine          | CCR5 | -1 | Training   | 99.84 | -1 |
| Ethosuximide        | CCR5 | -1 | Training   | 99.40 | -1 |
| Fentanyl            | CCR5 | -1 | Prediction | 95.10 | -1 |
| Fexofenadine        | CCR5 | -1 | Training   | 96.12 | -1 |
| Flecainide          | CCR5 | -1 | Training   | 89.91 | -1 |
| Flunarizine         | CCR5 | -1 | Training   | 28.49 | -1 |
| Flunisolide         | CCR5 | -1 | Prediction | 89.57 | -1 |
| Fluoxetine          | CCR5 | -1 | Training   | 97.75 | -1 |
| Fluvoxamine         | CCR5 | -1 | Training   | 99.03 | -1 |
| Gabapentin          | CCR5 | -1 | Training   | 99.38 | -1 |
| Gestodene           | CCR5 | -1 | Prediction | 98.42 | -1 |
| Glutethimide        | CCR5 | -1 | Training   | 99.48 | -1 |
| Glycopyrrolate      | CCR5 | -1 | Training   | 89.66 | -1 |
| Guanadrel           | CCR5 | -1 | Training   | 93.62 | -1 |
| Halofantrine        | CCR5 | -1 | Prediction | 76.15 | -1 |
| Haloperidol         | CCR5 | -1 | Training   | 38.19 | -1 |
| Halothane           | CCR5 | -1 | Training   | 99.05 | -1 |
| Hydromorphone       | CCR5 | -1 | Training   | 92.65 | -1 |
| Hydroxyzine         | CCR5 | -1 | Prediction | 94.87 | -1 |
| Indapamide          | CCR5 | -1 | Training   | 91.51 | -1 |
| Indomethacin        | CCR5 | -1 | Training   | 98.02 | -1 |
| Isoetharine         | CCR5 | -1 | Training   | 98.59 | -1 |
| Isoproterenol       | CCR5 | -1 | Prediction | 99.06 | -1 |
| Isosorbide          | CCR5 | -1 | Training   | 99.11 | -1 |
| Ketamine            | CCR5 | -1 | Training   | 90.37 | -1 |
| Labetalol           | CCR5 | -1 | Training   | 96.13 | -1 |
| Lacidipine          | CCR5 | -1 | Prediction | 99.85 | -1 |
| Lamotrigine         | CCR5 | -1 | Training   | 46.78 | -1 |
| Leuprorelin         | CCR5 | -1 | Training   | 10.63 | -1 |
| Levodopa            | CCR5 | -1 | Training   | 99.09 | -1 |
| Lidocaine           | CCR5 | -1 | Prediction | 98.49 | -1 |
| Loratadine          | CCR5 | -1 | Training   | 64.76 | -1 |
| Maprotiline         | CCR5 | -1 | Training   | 99.46 | -1 |
| Meclizine           | CCR5 | -1 | Training   | 83.64 | -1 |
| Medroxyprogesterone | CCR5 | -1 | Prediction | 79.46 | -1 |
| Melfalan            | CCR5 | -1 | Training   | 98.05 | -1 |
| Meprobamate         | CCR5 | -1 | Training   | 90.47 | -1 |
| Methamphetamine     | CCR5 | -1 | Training   | 99.43 | -1 |
| Methantheline       | CCR5 | -1 | Prediction | 96.51 | -1 |
| Methocarbamol       | CCR5 | -1 | Training   | 99.31 | -1 |
| Methoxyflurane      | CCR5 | -1 | Training   | 99.32 | -1 |
| Methscopolamine     | CCR5 | -1 | Training   | 81.34 | -1 |
| Methylphenidate     | CCR5 | -1 | Prediction | 99.23 | -1 |
| Methysergide        | CCR5 | -1 | Training   | 98.39 | -1 |
| Metoclopramide      | CCR5 | -1 | Training   | 98.99 | -1 |

|                 |      |    |            |       |    |
|-----------------|------|----|------------|-------|----|
| Midodrine       | CCR5 | -1 | Training   | 99.78 | -1 |
| Mirtazapine     | CCR5 | -1 | Prediction | 46.91 | -1 |
| Modafinil       | CCR5 | -1 | Training   | 97.24 | -1 |
| Montelukast     | CCR5 | -1 | Training   | 13.32 | -1 |
| Moricizine      | CCR5 | -1 | Training   | 99.63 | -1 |
| Morphine        | CCR5 | -1 | Prediction | 99.79 | -1 |
| Nalmefene       | CCR5 | -1 | Training   | 99.99 | -1 |
| Neostigmine     | CCR5 | -1 | Training   | 99.89 | -1 |
| Nifedipine      | CCR5 | -1 | Training   | 99.92 | -1 |
| Oxycodone       | CCR5 | -1 | Prediction | 99.87 | -1 |
| Paroxetine      | CCR5 | -1 | Training   | 96.69 | -1 |
| Pecazine        | CCR5 | -1 | Training   | 92.81 | -1 |
| Pergolide       | CCR5 | -1 | Training   | 99.95 | -1 |
| Phenylbutazone  | CCR5 | -1 | Prediction | 99.06 | -1 |
| Phenytoin       | CCR5 | -1 | Training   | 98.75 | -1 |
| Pilocarpine     | CCR5 | -1 | Training   | 81.00 | -1 |
| Pimozide        | CCR5 | -1 | Training   | 2.83  | -1 |
| Pramipexole     | CCR5 | -1 | Prediction | 97.27 | -1 |
| Probenecid      | CCR5 | -1 | Training   | 97.91 | -1 |
| Procyclidine    | CCR5 | -1 | Training   | 93.15 | -1 |
| Propantheline   | CCR5 | -1 | Training   | 97.03 | -1 |
| Pseudoephedrine | CCR5 | -1 | Prediction | 99.41 | -1 |
| Pyrantel        | CCR5 | -1 | Training   | 99.25 | -1 |
| Quinidine       | CCR5 | -1 | Training   | 48.12 | -1 |
| Ranitidine      | CCR5 | -1 | Training   | 99.04 | -1 |
| Rifampin        | CCR5 | -1 | Prediction | 69.10 | -1 |
| Risperidone     | CCR5 | -1 | Training   | 77.64 | -1 |
| Ropinirole      | CCR5 | -1 | Training   | 97.85 | -1 |
| Salmeterol      | CCR5 | -1 | Training   | 96.82 | -1 |
| Selegiline      | CCR5 | -1 | Prediction | 99.07 | -1 |
| Sulfinpyrazone  | CCR5 | -1 | Training   | 95.66 | -1 |
| Tegafur         | CCR5 | -1 | Training   | 70.14 | -1 |
| Terpin          | CCR5 | -1 | Training   | 98.52 | -1 |
| Tolcapone       | CCR5 | -1 | Prediction | 77.89 | -1 |
| Tranlycypromine | CCR5 | -1 | Training   | 99.26 | -1 |
| Trazodone       | CCR5 | -1 | Training   | 61.47 | -1 |
| Triamcinolone   | CCR5 | -1 | Training   | 99.79 | -1 |
| Valproic acid   | CCR5 | -1 | Prediction | 99.53 | -1 |
| Vancomycin      | CCR5 | -1 | Training   | 0.02  | -1 |
| Venlafaxine     | CCR5 | -1 | Training   | 99.26 | -1 |
| Verapamil       | CCR5 | -1 | Training   | 99.76 | -1 |
| Wytensin        | CCR5 | -1 | Prediction | 94.60 | -1 |
| Zafirlukast     | CCR5 | -1 | Training   | 97.78 | 1* |
| Zileuton        | CCR5 | -1 | Training   | 95.95 | -1 |
| Zonisamide      | CCR5 | -1 | Training   | 97.11 | -1 |

|               |       |   |            |       |     |
|---------------|-------|---|------------|-------|-----|
| CHEMBL1242210 | CXCR4 | 1 | Training   | 92.23 | 1   |
| CHEMBL218806  | CXCR4 | 1 | Training   | 99.37 | 1   |
| CHEMBL508054  | CXCR4 | 1 | Training   | 90.46 | 1   |
| CHEMBL1096504 | CXCR4 | 1 | Prediction | 98.63 | -1* |
| CHEMBL219474  | CXCR4 | 1 | Training   | 99.18 | 1   |
| CHEMBL1092637 | CXCR4 | 1 | Training   | 96.75 | 1   |
| CHEMBL454896  | CXCR4 | 1 | Training   | 91.97 | 1   |
| CHEMBL219339  | CXCR4 | 1 | Prediction | 99.18 | 1   |
| CHEMBL460298  | CXCR4 | 1 | Training   | 90.49 | 1   |
| CHEMBL518501  | CXCR4 | 1 | Training   | 95.07 | 1   |
| CHEMBL1682996 | CXCR4 | 1 | Training   | 94.98 | 1   |
| CHEMBL373636  | CXCR4 | 1 | Prediction | 99.42 | 1   |
| CHEMBL375990  | CXCR4 | 1 | Training   | 99.42 | 1   |
| CHEMBL518924  | CXCR4 | 1 | Training   | 83.57 | 1   |
| CHEMBL1094864 | CXCR4 | 1 | Training   | 99.01 | 1   |
| CHEMBL1682997 | CXCR4 | 1 | Prediction | 74.21 | 1   |
| CHEMBL1644080 | CXCR4 | 1 | Training   | 99.69 | 1   |
| CHEMBL376219  | CXCR4 | 1 | Training   | 99.37 | 1   |
| CHEMBL1088913 | CXCR4 | 1 | Training   | 83.57 | 1   |
| CHEMBL374421  | CXCR4 | 1 | Prediction | 99.37 | 1   |
| CHEMBL541728  | CXCR4 | 1 | Training   | 89.65 | 1   |
| CHEMBL436283  | CXCR4 | 1 | Training   | 99.18 | 1   |
| CHEMBL1682998 | CXCR4 | 1 | Training   | 93.14 | -1* |
| CHEMBL1644082 | CXCR4 | 1 | Prediction | 73.79 | 1   |
| CHEMBL375991  | CXCR4 | 1 | Training   | 99.25 | 1   |
| CHEMBL577268  | CXCR4 | 1 | Training   | 81.13 | 1   |
| CHEMBL452864  | CXCR4 | 1 | Training   | 88.77 | 1   |
| CHEMBL516630  | CXCR4 | 1 | Prediction | 89.97 | 1   |
| CHEMBL1682995 | CXCR4 | 1 | Training   | 97.23 | 1   |
| CHEMBL374108  | CXCR4 | 1 | Training   | 92.60 | 1   |
| CHEMBL461358  | CXCR4 | 1 | Training   | 79.64 | -1* |
| CHEMBL1091591 | CXCR4 | 1 | Prediction | 93.11 | 1   |
| CHEMBL461359  | CXCR4 | 1 | Training   | 98.44 | 1   |
| CHEMBL1644081 | CXCR4 | 1 | Training   | 86.38 | 1   |
| CHEMBL376811  | CXCR4 | 1 | Training   | 99.42 | 1   |
| CHEMBL1682994 | CXCR4 | 1 | Prediction | 81.15 | 1   |
| CHEMBL436536  | CXCR4 | 1 | Training   | 99.37 | 1   |
| CHEMBL506505  | CXCR4 | 1 | Training   | 98.94 | 1   |
| CHEMBL1093137 | CXCR4 | 1 | Training   | 99.91 | 1   |
| CHEMBL219096  | CXCR4 | 1 | Prediction | 99.37 | 1   |
| CHEMBL373440  | CXCR4 | 1 | Training   | 97.46 | 1   |
| CHEMBL375993  | CXCR4 | 1 | Training   | 99.37 | 1   |
| CHEMBL219075  | CXCR4 | 1 | Training   | 96.45 | 1   |
| CHEMBL387120  | CXCR4 | 1 | Prediction | 99.42 | 1   |
| CHEMBL460299  | CXCR4 | 1 | Training   | 87.76 | 1   |

|                |       |    |            |        |     |
|----------------|-------|----|------------|--------|-----|
| CHEMBL1093149  | CXCR4 | 1  | Training   | 83.57  | 1   |
| CHEMBL384429   | CXCR4 | 1  | Training   | 92.60  | 1   |
| CHEMBL375850   | CXCR4 | 1  | Prediction | 99.40  | 1   |
| CHEMBL1089434  | CXCR4 | 1  | Training   | 99.91  | 1   |
| CHEMBL374862   | CXCR4 | 1  | Training   | 99.46  | 1   |
| CHEMBL219135   | CXCR4 | 1  | Training   | 99.25  | 1   |
| CHEMBL462588   | CXCR4 | 1  | Prediction | 96.78  | 1   |
| CHEMBL426169   | CXCR4 | 1  | Training   | 99.40  | 1   |
| CHEMBL373637   | CXCR4 | 1  | Training   | 99.66  | 1   |
| CHEMBL450815   | CXCR4 | 1  | Training   | 91.40  | 1   |
| CHEMBL508684   | CXCR4 | 1  | Prediction | 93.38  | 1   |
| CHEMBL518041   | CXCR4 | 1  | Training   | 97.54  | -1* |
| CHEMBL450041   | CXCR4 | 1  | Training   | 91.40  | 1   |
| CHEMBL480502   | CXCR4 | 1  | Training   | 66.13  | 1   |
| CHEMBL472323   | CXCR4 | 1  | Prediction | 79.86  | 1   |
| CHEMBL443092   | CXCR4 | 1  | Training   | 93.13  | 1   |
| CHEMBL452868   | CXCR4 | 1  | Training   | 90.81  | 1   |
| CHEMBL446868   | CXCR4 | 1  | Training   | 93.38  | 1   |
| CHEMBL454689   | CXCR4 | 1  | Prediction | 86.67  | 1   |
| CHEMBL518004   | CXCR4 | 1  | Training   | 60.00  | 1   |
| CHEMBL516989   | CXCR4 | 1  | Training   | 85.39  | 1   |
| CHEMBL460484   | CXCR4 | 1  | Training   | 86.17  | 1   |
| CHEMBL516480   | CXCR4 | 1  | Prediction | 88.35  | 1   |
| Aceclofenac    | CXCR4 | -1 | Training   | 97.77  | -1  |
| Acetaminophen  | CXCR4 | -1 | Training   | 99.52  | -1  |
| Acetazolamide  | CXCR4 | -1 | Training   | 90.32  | -1  |
| Acetophenazine | CXCR4 | -1 | Prediction | 55.65  | 1*  |
| Amantadine     | CXCR4 | -1 | Training   | 98.06  | -1  |
| Ambenonium     | CXCR4 | -1 | Training   | 50.60  | -1  |
| Amineptine     | CXCR4 | -1 | Training   | 96.29  | -1  |
| Amiodarone     | CXCR4 | -1 | Prediction | 91.30  | -1  |
| Amitriptyline  | CXCR4 | -1 | Training   | 99.41  | -1  |
| Aprobarbital   | CXCR4 | -1 | Training   | 98.51  | -1  |
| Artane         | CXCR4 | -1 | Training   | 98.97  | -1  |
| Aspirin        | CXCR4 | -1 | Prediction | 99.63  | -1  |
| Atenolol       | CXCR4 | -1 | Training   | 99.28  | -1  |
| Atropine       | CXCR4 | -1 | Training   | 85.00  | -1  |
| Baclofen       | CXCR4 | -1 | Training   | 99.03  | -1  |
| Beclomethasone | CXCR4 | -1 | Prediction | 99.80  | -1  |
| Benzonatate    | CXCR4 | -1 | Training   | 98.74  | -1  |
| Biperiden      | CXCR4 | -1 | Training   | 98.07  | -1  |
| Bromocriptine  | CXCR4 | -1 | Training   | 96.67  | -1  |
| Buclizine      | CXCR4 | -1 | Prediction | 73.53  | -1  |
| Budesonide     | CXCR4 | -1 | Training   | 93.14  | -1  |
| Buprenorphine  | CXCR4 | -1 | Training   | 100.00 | -1  |

|                    |       |    |            |       |    |
|--------------------|-------|----|------------|-------|----|
| Caffeine           | CXCR4 | -1 | Training   | 81.30 | -1 |
| Cantil             | CXCR4 | -1 | Prediction | 98.73 | -1 |
| Carbachol          | CXCR4 | -1 | Training   | 96.00 | -1 |
| Carbamazepine      | CXCR4 | -1 | Training   | 92.28 | -1 |
| Carisoprodol       | CXCR4 | -1 | Training   | 85.75 | -1 |
| Carvedilol         | CXCR4 | -1 | Prediction | 99.54 | 1* |
| Cefoperazone       | CXCR4 | -1 | Training   | 0.91  | -1 |
| Chloral hydrate    | CXCR4 | -1 | Training   | 99.52 | -1 |
| Chlordiazepoxide   | CXCR4 | -1 | Training   | 95.46 | -1 |
| Chlorpropamide     | CXCR4 | -1 | Prediction | 86.60 | -1 |
| Chlorthalidone     | CXCR4 | -1 | Training   | 98.98 | -1 |
| Clidinium          | CXCR4 | -1 | Training   | 98.08 | -1 |
| Clobazam           | CXCR4 | -1 | Training   | 97.17 | -1 |
| Clofazimine        | CXCR4 | -1 | Prediction | 99.98 | -1 |
| Clomipramine       | CXCR4 | -1 | Training   | 95.89 | -1 |
| Clonidine          | CXCR4 | -1 | Training   | 91.64 | -1 |
| Codeine            | CXCR4 | -1 | Training   | 99.91 | -1 |
| Colchicine         | CXCR4 | -1 | Prediction | 99.48 | -1 |
| Cyclizine          | CXCR4 | -1 | Training   | 97.63 | -1 |
| Cyclosporin        | CXCR4 | -1 | Training   | 0.03  | -1 |
| Dextropropoxyphene | CXCR4 | -1 | Training   | 99.42 | -1 |
| Diazepam           | CXCR4 | -1 | Prediction | 96.90 | -1 |
| Diflucortolone     | CXCR4 | -1 | Training   | 88.70 | -1 |
| Dimercaprol        | CXCR4 | -1 | Training   | 99.81 | -1 |
| Diphenhydramine    | CXCR4 | -1 | Training   | 98.56 | -1 |
| Diphenidol         | CXCR4 | -1 | Prediction | 99.24 | 1* |
| Dobutamine         | CXCR4 | -1 | Training   | 97.49 | -1 |
| Dofetilide         | CXCR4 | -1 | Training   | 80.36 | -1 |
| Domperidone        | CXCR4 | -1 | Training   | 14.56 | -1 |
| Dopamine           | CXCR4 | -1 | Prediction | 99.65 | -1 |
| Doxazosin          | CXCR4 | -1 | Training   | 83.26 | -1 |
| Doxepin            | CXCR4 | -1 | Training   | 99.75 | -1 |
| Dronabinol         | CXCR4 | -1 | Training   | 99.48 | -1 |
| Droxicam           | CXCR4 | -1 | Prediction | 98.71 | -1 |
| Entacapone         | CXCR4 | -1 | Training   | 99.16 | -1 |
| Epinephrine        | CXCR4 | -1 | Training   | 99.55 | -1 |
| Eprosartan         | CXCR4 | -1 | Training   | 71.58 | -1 |
| Ergotamine         | CXCR4 | -1 | Prediction | 99.86 | -1 |
| Ethosuximide       | CXCR4 | -1 | Training   | 99.50 | -1 |
| Fentanyl           | CXCR4 | -1 | Training   | 95.89 | -1 |
| Fexofenadine       | CXCR4 | -1 | Training   | 96.75 | -1 |
| Flecainide         | CXCR4 | -1 | Prediction | 91.46 | -1 |
| Flunarizine        | CXCR4 | -1 | Training   | 32.37 | -1 |
| Flunisolide        | CXCR4 | -1 | Training   | 91.16 | -1 |
| Fluoxetine         | CXCR4 | -1 | Training   | 98.12 | -1 |

|                     |       |    |            |        |    |
|---------------------|-------|----|------------|--------|----|
| Fluvoxamine         | CXCR4 | -1 | Prediction | 99.19  | -1 |
| Gabapentin          | CXCR4 | -1 | Training   | 99.49  | -1 |
| Gestodene           | CXCR4 | -1 | Training   | 98.68  | -1 |
| Glutethimide        | CXCR4 | -1 | Training   | 99.57  | -1 |
| Glycopyrrolate      | CXCR4 | -1 | Prediction | 91.24  | -1 |
| Guanadrel           | CXCR4 | -1 | Training   | 94.63  | -1 |
| Halofantrine        | CXCR4 | -1 | Training   | 79.32  | -1 |
| Haloperidol         | CXCR4 | -1 | Training   | 42.60  | -1 |
| Halothane           | CXCR4 | -1 | Prediction | 99.21  | -1 |
| Hydromorphone       | CXCR4 | -1 | Training   | 93.81  | -1 |
| Hydroxyzine         | CXCR4 | -1 | Training   | 95.69  | 1* |
| Indapamide          | CXCR4 | -1 | Training   | 92.83  | -1 |
| Indomethacin        | CXCR4 | -1 | Prediction | 98.34  | -1 |
| Isoetharine         | CXCR4 | -1 | Training   | 98.82  | -1 |
| Isoproterenol       | CXCR4 | -1 | Training   | 99.21  | -1 |
| Isosorbide          | CXCR4 | -1 | Training   | 99.26  | -1 |
| Ketamine            | CXCR4 | -1 | Prediction | 91.85  | -1 |
| Labetalol           | CXCR4 | -1 | Training   | 96.76  | -1 |
| Lacidipine          | CXCR4 | -1 | Training   | 99.87  | -1 |
| Lamotrigine         | CXCR4 | -1 | Training   | 51.37  | -1 |
| Leuprorelin         | CXCR4 | -1 | Prediction | 12.51  | -1 |
| Levodopa            | CXCR4 | -1 | Training   | 99.24  | -1 |
| Lidocaine           | CXCR4 | -1 | Training   | 98.74  | -1 |
| Loratadine          | CXCR4 | -1 | Training   | 68.83  | -1 |
| Maprotiline         | CXCR4 | -1 | Prediction | 99.55  | -1 |
| Meclizine           | CXCR4 | -1 | Training   | 86.00  | -1 |
| Medroxyprogesterone | CXCR4 | -1 | Training   | 82.30  | -1 |
| Melfalan            | CXCR4 | -1 | Training   | 98.37  | -1 |
| Meprobamate         | CXCR4 | -1 | Prediction | 91.94  | -1 |
| Methamphetamine     | CXCR4 | -1 | Training   | 99.53  | -1 |
| Methantheline       | CXCR4 | -1 | Training   | 97.08  | -1 |
| Methocarbamol       | CXCR4 | -1 | Training   | 99.43  | -1 |
| Methoxyflurane      | CXCR4 | -1 | Prediction | 99.43  | -1 |
| Methscopolamine     | CXCR4 | -1 | Training   | 83.97  | -1 |
| Methylphenidate     | CXCR4 | -1 | Training   | 99.36  | -1 |
| Methysergide        | CXCR4 | -1 | Training   | 98.66  | -1 |
| Metoclopramide      | CXCR4 | -1 | Prediction | 99.16  | -1 |
| Midodrine           | CXCR4 | -1 | Training   | 99.82  | -1 |
| Mirtazapine         | CXCR4 | -1 | Training   | 51.50  | -1 |
| Modafinil           | CXCR4 | -1 | Training   | 97.69  | -1 |
| Montelukast         | CXCR4 | -1 | Prediction | 15.58  | -1 |
| Moricizine          | CXCR4 | -1 | Training   | 99.69  | -1 |
| Morphine            | CXCR4 | -1 | Training   | 99.83  | -1 |
| Nalmefene           | CXCR4 | -1 | Training   | 100.00 | -1 |
| Neostigmine         | CXCR4 | -1 | Prediction | 99.91  | -1 |

|                 |          |    |            |        |    |
|-----------------|----------|----|------------|--------|----|
| Nifedipine      | CXCR4    | -1 | Training   | 99.93  | -1 |
| Oxycodone       | CXCR4    | -1 | Training   | 99.89  | -1 |
| Paroxetine      | CXCR4    | -1 | Training   | 97.23  | -1 |
| Pecazine        | CXCR4    | -1 | Prediction | 93.94  | -1 |
| Pergolide       | CXCR4    | -1 | Training   | 99.96  | -1 |
| Phenylbutazone  | CXCR4    | -1 | Training   | 99.21  | -1 |
| Phenytoin       | CXCR4    | -1 | Training   | 98.95  | -1 |
| Pilocarpine     | CXCR4    | -1 | Prediction | 83.67  | -1 |
| Pimozide        | CXCR4    | -1 | Training   | 3.38   | -1 |
| Pramipexole     | CXCR4    | -1 | Training   | 97.72  | -1 |
| Probenecid      | CXCR4    | -1 | Training   | 98.26  | -1 |
| Procyclidine    | CXCR4    | -1 | Prediction | 94.23  | -1 |
| Propantheline   | CXCR4    | -1 | Training   | 97.52  | -1 |
| Pseudoephedrine | CXCR4    | -1 | Training   | 99.51  | -1 |
| Pyrantel        | CXCR4    | -1 | Training   | 99.37  | -1 |
| Quinidine       | CXCR4    | -1 | Prediction | 52.70  | -1 |
| Ranitidine      | CXCR4    | -1 | Training   | 99.20  | -1 |
| Rifampin        | CXCR4    | -1 | Training   | 72.87  | -1 |
| Risperidone     | CXCR4    | -1 | Training   | 80.66  | -1 |
| Ropinirole      | CXCR4    | -1 | Prediction | 98.21  | -1 |
| Salmeterol      | CXCR4    | -1 | Training   | 97.34  | 1* |
| Selegiline      | CXCR4    | -1 | Training   | 99.22  | -1 |
| Sulfinpyrazone  | CXCR4    | -1 | Training   | 96.36  | -1 |
| Tegafur         | CXCR4    | -1 | Prediction | 73.84  | -1 |
| Terpin          | CXCR4    | -1 | Training   | 98.77  | -1 |
| Tolcapone       | CXCR4    | -1 | Training   | 80.89  | -1 |
| Tranlycypromine | CXCR4    | -1 | Training   | 99.38  | -1 |
| Trazodone       | CXCR4    | -1 | Prediction | 65.72  | -1 |
| Triamcinolone   | CXCR4    | -1 | Training   | 99.82  | -1 |
| Valproic acid   | CXCR4    | -1 | Training   | 99.61  | -1 |
| Vancomycin      | CXCR4    | -1 | Training   | 0.02   | -1 |
| Venlafaxine     | CXCR4    | -1 | Prediction | 99.38  | -1 |
| Verapamil       | CXCR4    | -1 | Training   | 99.80  | -1 |
| Wyntensin       | CXCR4    | -1 | Training   | 95.46  | -1 |
| Zafirlukast     | CXCR4    | -1 | Training   | 98.14  | -1 |
| Zileuton        | CXCR4    | -1 | Prediction | 96.61  | -1 |
| Zonisamide      | CXCR4    | -1 | Training   | 97.58  | -1 |
| CHEMBL433165    | HIV-1 PR | 1  | Training   | 100.00 | 1  |
| CHEMBL76289     | HIV-1 PR | 1  | Training   | 98.92  | 1  |
| CHEMBL53254     | HIV-1 PR | 1  | Training   | 81.50  | 1  |
| CHEMBL52669     | HIV-1 PR | 1  | Prediction | 58.03  | 1  |
| CHEMBL421568    | HIV-1 PR | 1  | Training   | 99.88  | 1  |
| CHEMBL52702     | HIV-1 PR | 1  | Training   | 54.27  | 1  |
| CHEMBL319092    | HIV-1 PR | 1  | Training   | 81.50  | 1  |
| CHEMBL96352     | HIV-1 PR | 1  | Prediction | 100.00 | 1  |

|              |          |   |            |       |   |
|--------------|----------|---|------------|-------|---|
| CHEMBL430469 | HIV-1 PR | 1 | Training   | 82.93 | 1 |
| CHEMBL319408 | HIV-1 PR | 1 | Training   | 81.50 | 1 |
| CHEMBL319792 | HIV-1 PR | 1 | Training   | 82.93 | 1 |
| CHEMBL295414 | HIV-1 PR | 1 | Prediction | 87.11 | 1 |
| CHEMBL300140 | HIV-1 PR | 1 | Training   | 94.71 | 1 |
| CHEMBL298189 | HIV-1 PR | 1 | Training   | 69.55 | 1 |
| CHEMBL433270 | HIV-1 PR | 1 | Training   | 62.70 | 1 |
| CHEMBL96697  | HIV-1 PR | 1 | Prediction | 99.80 | 1 |
| CHEMBL100310 | HIV-1 PR | 1 | Training   | 84.34 | 1 |
| CHEMBL300754 | HIV-1 PR | 1 | Training   | 74.83 | 1 |
| CHEMBL96100  | HIV-1 PR | 1 | Training   | 99.81 | 1 |
| CHEMBL94824  | HIV-1 PR | 1 | Prediction | 98.79 | 1 |
| CHEMBL52645  | HIV-1 PR | 1 | Training   | 47.95 | 1 |
| CHEMBL314510 | HIV-1 PR | 1 | Training   | 99.00 | 1 |
| CHEMBL297720 | HIV-1 PR | 1 | Training   | 58.27 | 1 |
| CHEMBL79236  | HIV-1 PR | 1 | Prediction | 99.52 | 1 |
| CHEMBL49768  | HIV-1 PR | 1 | Training   | 93.45 | 1 |
| CHEMBL295442 | HIV-1 PR | 1 | Training   | 92.69 | 1 |
| CHEMBL416082 | HIV-1 PR | 1 | Training   | 97.71 | 1 |
| CHEMBL312238 | HIV-1 PR | 1 | Prediction | 99.29 | 1 |
| CHEMBL297294 | HIV-1 PR | 1 | Training   | 94.90 | 1 |
| CHEMBL316454 | HIV-1 PR | 1 | Training   | 99.80 | 1 |
| CHEMBL295549 | HIV-1 PR | 1 | Training   | 80.48 | 1 |
| CHEMBL419923 | HIV-1 PR | 1 | Prediction | 84.28 | 1 |
| CHEMBL44489  | HIV-1 PR | 1 | Training   | 90.70 | 1 |
| CHEMBL293992 | HIV-1 PR | 1 | Training   | 95.45 | 1 |
| CHEMBL285759 | HIV-1 PR | 1 | Training   | 82.35 | 1 |
| CHEMBL318777 | HIV-1 PR | 1 | Prediction | 99.88 | 1 |
| CHEMBL294392 | HIV-1 PR | 1 | Training   | 93.09 | 1 |
| CHEMBL96645  | HIV-1 PR | 1 | Training   | 99.81 | 1 |
| CHEMBL297066 | HIV-1 PR | 1 | Training   | 92.88 | 1 |
| CHEMBL301571 | HIV-1 PR | 1 | Prediction | 95.79 | 1 |
| CHEMBL318525 | HIV-1 PR | 1 | Training   | 99.99 | 1 |
| CHEMBL311953 | HIV-1 PR | 1 | Training   | 99.17 | 1 |
| CHEMBL295470 | HIV-1 PR | 1 | Training   | 90.77 | 1 |
| CHEMBL431999 | HIV-1 PR | 1 | Prediction | 85.38 | 1 |
| CHEMBL299884 | HIV-1 PR | 1 | Training   | 96.70 | 1 |
| CHEMBL298316 | HIV-1 PR | 1 | Training   | 88.76 | 1 |
| CHEMBL291196 | HIV-1 PR | 1 | Training   | 89.92 | 1 |
| CHEMBL290987 | HIV-1 PR | 1 | Prediction | 88.76 | 1 |
| CHEMBL295530 | HIV-1 PR | 1 | Training   | 89.81 | 1 |
| CHEMBL47610  | HIV-1 PR | 1 | Training   | 99.94 | 1 |
| CHEMBL46114  | HIV-1 PR | 1 | Training   | 89.18 | 1 |
| CHEMBL295471 | HIV-1 PR | 1 | Prediction | 95.69 | 1 |
| CHEMBL111143 | HIV-1 PR | 1 | Training   | 76.72 | 1 |



|              |          |   |            |       |     |
|--------------|----------|---|------------|-------|-----|
| CHEMBL45451  | HIV-1 PR | 1 | Training   | 92.05 | 1   |
| CHEMBL292193 | HIV-1 PR | 1 | Training   | 95.42 | 1   |
| CHEMBL322984 | HIV-1 PR | 1 | Prediction | 86.80 | 1   |
| CHEMBL77786  | HIV-1 PR | 1 | Training   | 75.02 | 1   |
| CHEMBL48565  | HIV-1 PR | 1 | Training   | 99.01 | 1   |
| CHEMBL297673 | HIV-1 PR | 1 | Training   | 94.16 | 1   |
| CHEMBL46274  | HIV-1 PR | 1 | Prediction | 92.61 | 1   |
| CHEMBL276447 | HIV-1 PR | 1 | Training   | 98.69 | 1   |
| CHEMBL44578  | HIV-1 PR | 1 | Training   | 94.88 | 1   |
| CHEMBL99267  | HIV-1 PR | 1 | Training   | 98.16 | 1   |
| CHEMBL100040 | HIV-1 PR | 1 | Prediction | 99.22 | 1   |
| CHEMBL98589  | HIV-1 PR | 1 | Training   | 98.21 | 1   |
| CHEMBL297189 | HIV-1 PR | 1 | Training   | 88.57 | 1   |
| CHEMBL95228  | HIV-1 PR | 1 | Training   | 99.89 | 1   |
| CHEMBL98954  | HIV-1 PR | 1 | Prediction | 99.24 | 1   |
| CHEMBL9544   | HIV-1 PR | 1 | Training   | 99.01 | 1   |
| CHEMBL9705   | HIV-1 PR | 1 | Training   | 99.01 | 1   |
| CHEMBL295357 | HIV-1 PR | 1 | Training   | 92.51 | 1   |
| CHEMBL265514 | HIV-1 PR | 1 | Prediction | 87.62 | 1   |
| CHEMBL413515 | HIV-1 PR | 1 | Training   | 99.81 | -1* |
| CHEMBL296115 | HIV-1 PR | 1 | Training   | 86.38 | 1   |
| CHEMBL47480  | HIV-1 PR | 1 | Training   | 96.75 | 1   |
| CHEMBL77497  | HIV-1 PR | 1 | Prediction | 98.35 | 1   |
| CHEMBL52670  | HIV-1 PR | 1 | Training   | 94.54 | 1   |
| CHEMBL329750 | HIV-1 PR | 1 | Training   | 91.43 | 1   |
| CHEMBL410311 | HIV-1 PR | 1 | Training   | 94.50 | 1   |
| CHEMBL108918 | HIV-1 PR | 1 | Prediction | 89.72 | 1   |
| CHEMBL164045 | HIV-1 PR | 1 | Training   | 97.65 | 1   |
| CHEMBL351834 | HIV-1 PR | 1 | Training   | 99.45 | 1   |
| CHEMBL296484 | HIV-1 PR | 1 | Training   | 95.83 | 1   |
| CHEMBL297620 | HIV-1 PR | 1 | Prediction | 95.23 | 1   |
| CHEMBL295904 | HIV-1 PR | 1 | Training   | 95.31 | 1   |
| CHEMBL298393 | HIV-1 PR | 1 | Training   | 54.27 | 1   |
| CHEMBL305814 | HIV-1 PR | 1 | Training   | 91.98 | 1   |
| CHEMBL295924 | HIV-1 PR | 1 | Prediction | 96.78 | 1   |
| CHEMBL265516 | HIV-1 PR | 1 | Training   | 90.45 | 1   |
| CHEMBL308780 | HIV-1 PR | 1 | Training   | 86.38 | 1   |
| CHEMBL296493 | HIV-1 PR | 1 | Training   | 88.46 | 1   |
| CHEMBL301269 | HIV-1 PR | 1 | Prediction | 92.73 | 1   |
| CHEMBL101560 | HIV-1 PR | 1 | Training   | 83.32 | 1   |
| CHEMBL78261  | HIV-1 PR | 1 | Training   | 56.04 | 1   |
| CHEMBL277908 | HIV-1 PR | 1 | Training   | 86.38 | 1   |
| CHEMBL77431  | HIV-1 PR | 1 | Prediction | 70.79 | 1   |
| CHEMBL297045 | HIV-1 PR | 1 | Training   | 88.76 | 1   |
| CHEMBL291195 | HIV-1 PR | 1 | Training   | 97.03 | 1   |

|                |          |    |            |       |    |
|----------------|----------|----|------------|-------|----|
| CHEMBL82245    | HIV-1 PR | 1  | Training   | 99.21 | 1  |
| CHEMBL429722   | HIV-1 PR | 1  | Prediction | 99.01 | 1  |
| CHEMBL310417   | HIV-1 PR | 1  | Training   | 98.81 | 1  |
| CHEMBL49002    | HIV-1 PR | 1  | Training   | 98.56 | 1  |
| CHEMBL73880    | HIV-1 PR | 1  | Training   | 98.25 | 1  |
| CHEMBL115      | HIV-1 PR | 1  | Prediction | 99.86 | 1  |
| CHEMBL265975   | HIV-1 PR | 1  | Training   | 79.26 | 1  |
| CHEMBL289195   | HIV-1 PR | 1  | Training   | 96.38 | 1  |
| CHEMBL99357    | HIV-1 PR | 1  | Training   | 99.71 | 1  |
| CHEMBL75363    | HIV-1 PR | 1  | Prediction | 82.35 | 1  |
| CHEMBL49544    | HIV-1 PR | 1  | Training   | 96.73 | 1  |
| CHEMBL298788   | HIV-1 PR | 1  | Training   | 98.80 | 1  |
| CHEMBL95413    | HIV-1 PR | 1  | Training   | 79.23 | 1  |
| CHEMBL296137   | HIV-1 PR | 1  | Prediction | 97.24 | 1  |
| CHEMBL202345   | HIV-1 PR | 1  | Training   | 5.13  | 1  |
| CHEMBL306963   | HIV-1 PR | 1  | Training   | 93.45 | 1  |
| CHEMBL97253    | HIV-1 PR | 1  | Training   | 79.33 | 1  |
| CHEMBL98129    | HIV-1 PR | 1  | Prediction | 80.52 | 1  |
| CHEMBL47712    | HIV-1 PR | 1  | Training   | 94.22 | 1  |
| CHEMBL60697    | HIV-1 PR | 1  | Training   | 97.31 | 1  |
| CHEMBL319053   | HIV-1 PR | 1  | Training   | 99.99 | 1  |
| CHEMBL100089   | HIV-1 PR | 1  | Prediction | 98.12 | 1  |
| CHEMBL432550   | HIV-1 PR | 1  | Training   | 99.31 | 1  |
| CHEMBL316694   | HIV-1 PR | 1  | Training   | 95.22 | 1  |
| Aceclofenac    | HIV-1 PR | -1 | Training   | 97.10 | -1 |
| Acetaminophen  | HIV-1 PR | -1 | Prediction | 99.37 | -1 |
| Acetazolamide  | HIV-1 PR | -1 | Training   | 87.70 | -1 |
| Acetophenazine | HIV-1 PR | -1 | Training   | 48.95 | -1 |
| Amantadine     | HIV-1 PR | -1 | Training   | 97.48 | -1 |
| Ambenonium     | HIV-1 PR | -1 | Prediction | 43.91 | -1 |
| Amineptine     | HIV-1 PR | -1 | Training   | 95.20 | -1 |
| Amiodarone     | HIV-1 PR | -1 | Training   | 88.92 | -1 |
| Amitriptyline  | HIV-1 PR | -1 | Training   | 99.23 | -1 |
| Aprobarbital   | HIV-1 PR | -1 | Prediction | 98.06 | -1 |
| Artane         | HIV-1 PR | -1 | Training   | 98.65 | -1 |
| Aspirin        | HIV-1 PR | -1 | Training   | 99.52 | -1 |
| Atenolol       | HIV-1 PR | -1 | Training   | 99.06 | -1 |
| Atropine       | HIV-1 PR | -1 | Prediction | 81.24 | -1 |
| Baclofen       | HIV-1 PR | -1 | Training   | 98.74 | -1 |
| Beclomethasone | HIV-1 PR | -1 | Training   | 99.73 | -1 |
| Benzonatate    | HIV-1 PR | -1 | Training   | 98.36 | -1 |
| Biperiden      | HIV-1 PR | -1 | Prediction | 97.49 | -1 |
| Bromocriptine  | HIV-1 PR | -1 | Training   | 95.69 | -1 |
| Bucizine       | HIV-1 PR | -1 | Training   | 67.98 | -1 |
| Budesonide     | HIV-1 PR | -1 | Training   | 91.22 | -1 |

|                    |          |    |            |        |    |
|--------------------|----------|----|------------|--------|----|
| Buprenorphine      | HIV-1 PR | -1 | Prediction | 100.00 | -1 |
| Caffeine           | HIV-1 PR | -1 | Training   | 76.87  | -1 |
| Cantil             | HIV-1 PR | -1 | Training   | 98.35  | -1 |
| Carbachol          | HIV-1 PR | -1 | Training   | 94.83  | -1 |
| Carbamazepine      | HIV-1 PR | -1 | Prediction | 90.14  | -1 |
| Carisoprodol       | HIV-1 PR | -1 | Training   | 82.14  | -1 |
| Carvedilol         | HIV-1 PR | -1 | Training   | 99.40  | -1 |
| Cefoperazone       | HIV-1 PR | -1 | Training   | 0.70   | -1 |
| Chloral hydrate    | HIV-1 PR | -1 | Prediction | 99.38  | -1 |
| Chlordiazepoxide   | HIV-1 PR | -1 | Training   | 94.14  | -1 |
| Chlorpropamide     | HIV-1 PR | -1 | Training   | 83.17  | -1 |
| Chlorthalidone     | HIV-1 PR | -1 | Training   | 98.67  | -1 |
| Clidinium          | HIV-1 PR | -1 | Prediction | 97.51  | -1 |
| Clobazam           | HIV-1 PR | -1 | Training   | 96.33  | -1 |
| Clofazimine        | HIV-1 PR | -1 | Training   | 99.97  | -1 |
| Clomipramine       | HIV-1 PR | -1 | Training   | 94.69  | -1 |
| Clonidine          | HIV-1 PR | -1 | Prediction | 89.33  | -1 |
| Codeine            | HIV-1 PR | -1 | Training   | 99.88  | -1 |
| Colchicine         | HIV-1 PR | -1 | Training   | 99.32  | -1 |
| Cyclizine          | HIV-1 PR | -1 | Training   | 96.93  | -1 |
| Cyclosporin        | HIV-1 PR | -1 | Prediction | 0.02   | -1 |
| Dextropropoxyphene | HIV-1 PR | -1 | Training   | 99.25  | -1 |
| Diazepam           | HIV-1 PR | -1 | Training   | 95.98  | -1 |
| Diflucortolone     | HIV-1 PR | -1 | Training   | 85.72  | -1 |
| Dimercaprol        | HIV-1 PR | -1 | Prediction | 99.75  | -1 |
| Diphenhydramine    | HIV-1 PR | -1 | Training   | 98.13  | -1 |
| Diphenidol         | HIV-1 PR | -1 | Training   | 99.01  | -1 |
| Dobutamine         | HIV-1 PR | -1 | Training   | 96.75  | -1 |
| Dofetilide         | HIV-1 PR | -1 | Prediction | 75.77  | -1 |
| Domperidone        | HIV-1 PR | -1 | Training   | 11.53  | -1 |
| Dopamine           | HIV-1 PR | -1 | Training   | 99.54  | -1 |
| Doxazosin          | HIV-1 PR | -1 | Training   | 79.18  | -1 |
| Doxepin            | HIV-1 PR | -1 | Prediction | 99.67  | -1 |
| Dronabinol         | HIV-1 PR | -1 | Training   | 99.32  | -1 |
| Droxycam           | HIV-1 PR | -1 | Training   | 98.32  | -1 |
| Entacapone         | HIV-1 PR | -1 | Training   | 98.91  | -1 |
| Epinephrine        | HIV-1 PR | -1 | Prediction | 99.41  | -1 |
| Eprosartan         | HIV-1 PR | -1 | Training   | 65.81  | -1 |
| Ergotamine         | HIV-1 PR | -1 | Training   | 99.82  | -1 |
| Ethosuximide       | HIV-1 PR | -1 | Training   | 99.35  | -1 |
| Fentanyl           | HIV-1 PR | -1 | Prediction | 94.69  | -1 |
| Fexofenadine       | HIV-1 PR | -1 | Training   | 95.79  | -1 |
| Flecainide         | HIV-1 PR | -1 | Training   | 89.11  | -1 |
| Flunarizine        | HIV-1 PR | -1 | Training   | 26.78  | -1 |
| Flunisolide        | HIV-1 PR | -1 | Prediction | 88.74  | -1 |

|                     |          |    |            |       |    |
|---------------------|----------|----|------------|-------|----|
| Fluoxetine          | HIV-1 PR | -1 | Training   | 97.56 | -1 |
| Fluvoxamine         | HIV-1 PR | -1 | Training   | 98.95 | -1 |
| Gabapentin          | HIV-1 PR | -1 | Training   | 99.33 | -1 |
| Gestodene           | HIV-1 PR | -1 | Prediction | 98.29 | -1 |
| Glutethimide        | HIV-1 PR | -1 | Training   | 99.43 | -1 |
| Glycopyrrolate      | HIV-1 PR | -1 | Training   | 88.84 | -1 |
| Guanadrel           | HIV-1 PR | -1 | Training   | 93.09 | -1 |
| Halofantrine        | HIV-1 PR | -1 | Prediction | 74.57 | -1 |
| Haloperidol         | HIV-1 PR | -1 | Training   | 36.20 | -1 |
| Halothane           | HIV-1 PR | -1 | Training   | 98.97 | -1 |
| Hydromorphone       | HIV-1 PR | -1 | Training   | 92.05 | -1 |
| Hydroxyzine         | HIV-1 PR | -1 | Prediction | 94.44 | -1 |
| Indapamide          | HIV-1 PR | -1 | Training   | 90.82 | -1 |
| Indomethacin        | HIV-1 PR | -1 | Training   | 97.84 | -1 |
| Isoetharine         | HIV-1 PR | -1 | Training   | 98.47 | -1 |
| Isoproterenol       | HIV-1 PR | -1 | Prediction | 98.97 | -1 |
| Isosorbide          | HIV-1 PR | -1 | Training   | 99.04 | -1 |
| Ketamine            | HIV-1 PR | -1 | Training   | 89.60 | -1 |
| Labetalol           | HIV-1 PR | -1 | Training   | 95.80 | -1 |
| Lacidipine          | HIV-1 PR | -1 | Prediction | 99.83 | -1 |
| Lamotrigine         | HIV-1 PR | -1 | Training   | 44.67 | -1 |
| Leuprorelin         | HIV-1 PR | -1 | Training   | 9.85  | -1 |
| Levodopa            | HIV-1 PR | -1 | Training   | 99.01 | -1 |
| Lidocaine           | HIV-1 PR | -1 | Prediction | 98.35 | -1 |
| Loratadine          | HIV-1 PR | -1 | Training   | 62.80 | -1 |
| Maprotiline         | HIV-1 PR | -1 | Training   | 99.42 | -1 |
| Meclizine           | HIV-1 PR | -1 | Training   | 82.44 | -1 |
| Medroxyprogesterone | HIV-1 PR | -1 | Prediction | 78.04 | -1 |
| Melfalan            | HIV-1 PR | -1 | Training   | 97.88 | -1 |
| Meprobamate         | HIV-1 PR | -1 | Training   | 89.71 | -1 |
| Methamphetamine     | HIV-1 PR | -1 | Training   | 99.38 | -1 |
| Methantheline       | HIV-1 PR | -1 | Prediction | 96.21 | -1 |
| Methocarbamol       | HIV-1 PR | -1 | Training   | 99.25 | -1 |
| Methoxyflurane      | HIV-1 PR | -1 | Training   | 99.26 | -1 |
| Methscopolamine     | HIV-1 PR | -1 | Training   | 80.01 | -1 |
| Methylphenidate     | HIV-1 PR | -1 | Prediction | 99.17 | -1 |
| Methysergide        | HIV-1 PR | -1 | Training   | 98.25 | -1 |
| Metoclopramide      | HIV-1 PR | -1 | Training   | 98.90 | -1 |
| Midodrine           | HIV-1 PR | -1 | Training   | 99.76 | -1 |
| Mirtazapine         | HIV-1 PR | -1 | Prediction | 44.80 | -1 |
| Modafinil           | HIV-1 PR | -1 | Training   | 97.00 | -1 |
| Montelukast         | HIV-1 PR | -1 | Training   | 12.37 | -1 |
| Moricizine          | HIV-1 PR | -1 | Training   | 99.60 | -1 |
| Morphine            | HIV-1 PR | -1 | Prediction | 99.77 | -1 |
| Nalmefene           | HIV-1 PR | -1 | Training   | 99.99 | -1 |

|                 |          |    |            |       |     |
|-----------------|----------|----|------------|-------|-----|
| Neostigmine     | HIV-1 PR | -1 | Training   | 99.89 | -1  |
| Nifedipine      | HIV-1 PR | -1 | Training   | 99.91 | -1  |
| Oxycodone       | HIV-1 PR | -1 | Prediction | 99.85 | -1  |
| Paroxetine      | HIV-1 PR | -1 | Training   | 96.41 | -1  |
| Pecazine        | HIV-1 PR | -1 | Training   | 92.22 | -1  |
| Pergolide       | HIV-1 PR | -1 | Training   | 99.95 | -1  |
| Phenylbutazone  | HIV-1 PR | -1 | Prediction | 98.97 | -1  |
| Phenytoin       | HIV-1 PR | -1 | Training   | 98.64 | -1  |
| Pilocarpine     | HIV-1 PR | -1 | Training   | 79.65 | -1  |
| Pimozide        | HIV-1 PR | -1 | Training   | 2.60  | -1  |
| Pramipexole     | HIV-1 PR | -1 | Prediction | 97.04 | -1  |
| Probenecid      | HIV-1 PR | -1 | Training   | 97.73 | -1  |
| Procyclidine    | HIV-1 PR | -1 | Training   | 92.58 | -1  |
| Proprantheline  | HIV-1 PR | -1 | Training   | 96.78 | -1  |
| Pseudoephedrine | HIV-1 PR | -1 | Prediction | 99.36 | -1  |
| Pyrantel        | HIV-1 PR | -1 | Training   | 99.18 | -1  |
| Quinidine       | HIV-1 PR | -1 | Training   | 45.99 | -1  |
| Ranitidine      | HIV-1 PR | -1 | Training   | 98.96 | -1  |
| Rifampin        | HIV-1 PR | -1 | Prediction | 67.25 | -1  |
| Risperidone     | HIV-1 PR | -1 | Training   | 76.12 | -1  |
| Ropinirole      | HIV-1 PR | -1 | Training   | 97.67 | -1  |
| Salmeterol      | HIV-1 PR | -1 | Training   | 96.54 | -1  |
| Selegiline      | HIV-1 PR | -1 | Prediction | 98.99 | -1  |
| Sulfinpyrazone  | HIV-1 PR | -1 | Training   | 95.29 | -1  |
| Tegafur         | HIV-1 PR | -1 | Training   | 68.33 | -1  |
| Terpin          | HIV-1 PR | -1 | Training   | 98.39 | -1  |
| Tolcapone       | HIV-1 PR | -1 | Prediction | 76.39 | -1  |
| Tranlycypromine | HIV-1 PR | -1 | Training   | 99.19 | -1  |
| Trazodone       | HIV-1 PR | -1 | Training   | 59.44 | -1  |
| Triamcinolone   | HIV-1 PR | -1 | Training   | 99.77 | -1  |
| Valproic acid   | HIV-1 PR | -1 | Prediction | 99.49 | -1  |
| Vancomycin      | HIV-1 PR | -1 | Training   | 0.02  | -1  |
| Venlafaxine     | HIV-1 PR | -1 | Training   | 99.19 | -1  |
| Verapamil       | HIV-1 PR | -1 | Training   | 99.74 | -1  |
| Wytensin        | HIV-1 PR | -1 | Prediction | 94.15 | -1  |
| Zafirlukast     | HIV-1 PR | -1 | Training   | 97.59 | -1  |
| Zileuton        | HIV-1 PR | -1 | Training   | 95.61 | -1  |
| Zonisamide      | HIV-1 PR | -1 | Training   | 96.86 | -1  |
| CHEMBL338099    | HIV-1 RT | 1  | Training   | 99.06 | -1* |
| CHEMBL88677     | HIV-1 RT | 1  | Training   | 98.85 | 1   |
| CHEMBL132756    | HIV-1 RT | 1  | Prediction | 99.89 | 1   |
| CHEMBL253186    | HIV-1 RT | 1  | Training   | 83.86 | 1   |
| CHEMBL135380    | HIV-1    | 1  | Training   | 88.75 | 1   |

|              |             |   |            |        |     |
|--------------|-------------|---|------------|--------|-----|
|              | RT          |   |            |        |     |
| CHEMBL57     | HIV-1<br>RT | 1 | Training   | 94.94  | -1* |
| CHEMBL37024  | HIV-1<br>RT | 1 | Prediction | 98.79  | 1   |
| CHEMBL37835  | HIV-1<br>RT | 1 | Training   | 96.20  | 1   |
| CHEMBL541204 | HIV-1<br>RT | 1 | Training   | 98.79  | 1   |
| CHEMBL436376 | HIV-1<br>RT | 1 | Training   | 99.90  | 1   |
| CHEMBL436177 | HIV-1<br>RT | 1 | Prediction | 94.48  | 1   |
| CHEMBL103706 | HIV-1<br>RT | 1 | Training   | 99.77  | 1   |
| CHEMBL341201 | HIV-1<br>RT | 1 | Training   | 94.01  | 1   |
| CHEMBL37762  | HIV-1<br>RT | 1 | Training   | 99.22  | 1   |
| CHEMBL38341  | HIV-1<br>RT | 1 | Prediction | 89.68  | 1   |
| CHEMBL408273 | HIV-1<br>RT | 1 | Training   | 99.98  | -1* |
| CHEMBL134278 | HIV-1<br>RT | 1 | Training   | 99.68  | 1   |
| CHEMBL133658 | HIV-1<br>RT | 1 | Training   | 99.94  | 1   |
| CHEMBL382553 | HIV-1<br>RT | 1 | Prediction | 84.73  | 1   |
| CHEMBL435600 | HIV-1<br>RT | 1 | Training   | 100.00 | 1   |
| CHEMBL398766 | HIV-1<br>RT | 1 | Training   | 98.54  | 1   |
| CHEMBL207512 | HIV-1<br>RT | 1 | Training   | 87.37  | 1   |
| CHEMBL334983 | HIV-1<br>RT | 1 | Prediction | 98.04  | 1   |
| CHEMBL207839 | HIV-1<br>RT | 1 | Training   | 86.23  | 1   |
| CHEMBL133195 | HIV-1<br>RT | 1 | Training   | 98.33  | 1   |
| CHEMBL206522 | HIV-1<br>RT | 1 | Training   | 93.73  | -1* |
| CHEMBL381134 | HIV-1<br>RT | 1 | Prediction | 86.37  | 1   |
| CHEMBL56135  | HIV-1<br>RT | 1 | Training   | 50.09  | 1   |
| CHEMBL287317 | HIV-1<br>RT | 1 | Training   | 82.53  | 1   |
| CHEMBL133559 | HIV-1<br>RT | 1 | Training   | 99.67  | 1   |
| CHEMBL134026 | HIV-1<br>RT | 1 | Prediction | 99.69  | 1   |
| CHEMBL36424  | HIV-1<br>RT | 1 | Training   | 93.38  | 1   |
| CHEMBL253169 | HIV-1<br>RT | 1 | Training   | 99.07  | 1   |
| CHEMBL205152 | HIV-1<br>RT | 1 | Training   | 91.48  | 1   |

|              |             |   |            |       |     |
|--------------|-------------|---|------------|-------|-----|
| CHEMBL379722 | HIV-1<br>RT | 1 | Prediction | 93.12 | 1   |
| CHEMBL252964 | HIV-1<br>RT | 1 | Training   | 98.07 | 1   |
| CHEMBL207929 | HIV-1<br>RT | 1 | Training   | 87.37 | 1   |
| CHEMBL38318  | HIV-1<br>RT | 1 | Training   | 99.94 | 1   |
| CHEMBL206962 | HIV-1<br>RT | 1 | Prediction | 85.01 | 1   |
| CHEMBL134630 | HIV-1<br>RT | 1 | Training   | 82.73 | 1   |
| CHEMBL340047 | HIV-1<br>RT | 1 | Training   | 99.94 | 1   |
| CHEMBL399976 | HIV-1<br>RT | 1 | Training   | 89.26 | 1   |
| CHEMBL377010 | HIV-1<br>RT | 1 | Prediction | 78.83 | 1   |
| CHEMBL135254 | HIV-1<br>RT | 1 | Training   | 99.89 | 1   |
| CHEMBL236161 | HIV-1<br>RT | 1 | Training   | 72.05 | 1   |
| CHEMBL253822 | HIV-1<br>RT | 1 | Training   | 55.12 | -1* |
| CHEMBL399503 | HIV-1<br>RT | 1 | Prediction | 85.07 | 1   |
| CHEMBL207920 | HIV-1<br>RT | 1 | Training   | 93.32 | 1   |
| CHEMBL306904 | HIV-1<br>RT | 1 | Training   | 5.64  | 1   |
| CHEMBL402265 | HIV-1<br>RT | 1 | Training   | 98.06 | 1   |
| CHEMBL429488 | HIV-1<br>RT | 1 | Prediction | 99.89 | 1   |
| CHEMBL135259 | HIV-1<br>RT | 1 | Training   | 99.30 | 1   |
| CHEMBL400547 | HIV-1<br>RT | 1 | Training   | 88.03 | 1   |
| CHEMBL207900 | HIV-1<br>RT | 1 | Training   | 82.96 | 1   |
| CHEMBL291983 | HIV-1<br>RT | 1 | Prediction | 49.06 | 1   |
| CHEMBL131972 | HIV-1<br>RT | 1 | Training   | 98.92 | 1   |
| CHEMBL135105 | HIV-1<br>RT | 1 | Training   | 99.99 | 1   |
| CHEMBL254007 | HIV-1<br>RT | 1 | Training   | 99.79 | 1   |
| CHEMBL398890 | HIV-1<br>RT | 1 | Prediction | 97.88 | 1   |
| CHEMBL253369 | HIV-1<br>RT | 1 | Training   | 91.07 | 1   |
| CHEMBL253170 | HIV-1<br>RT | 1 | Training   | 93.69 | 1   |
| CHEMBL252137 | HIV-1<br>RT | 1 | Training   | 89.46 | 1   |
| CHEMBL129    | HIV-1<br>RT | 1 | Prediction | 3.63  | 1   |
| CHEMBL132425 | HIV-1       | 1 | Training   | 99.99 | 1   |

|              | RT          |   |            |       |     |
|--------------|-------------|---|------------|-------|-----|
| CHEMBL137111 | HIV-1<br>RT | 1 | Training   | 84.97 | 1   |
| CHEMBL299001 | HIV-1<br>RT | 1 | Training   | 45.10 | 1   |
| CHEMBL443063 | HIV-1<br>RT | 1 | Prediction | 99.21 | 1   |
| CHEMBL37834  | HIV-1<br>RT | 1 | Training   | 90.87 | 1   |
| CHEMBL381513 | HIV-1<br>RT | 1 | Training   | 79.33 | 1   |
| CHEMBL83412  | HIV-1<br>RT | 1 | Training   | 6.17  | 1   |
| CHEMBL252963 | HIV-1<br>RT | 1 | Prediction | 99.18 | 1   |
| CHEMBL35729  | HIV-1<br>RT | 1 | Training   | 83.82 | 1   |
| CHEMBL253171 | HIV-1<br>RT | 1 | Training   | 94.20 | 1   |
| CHEMBL593    | HIV-1<br>RT | 1 | Training   | 90.99 | 1   |
| CHEMBL135808 | HIV-1<br>RT | 1 | Prediction | 99.96 | 1   |
| CHEMBL37025  | HIV-1<br>RT | 1 | Training   | 96.14 | 1   |
| CHEMBL46745  | HIV-1<br>RT | 1 | Training   | 32.43 | 1   |
| CHEMBL84621  | HIV-1<br>RT | 1 | Training   | 21.33 | 1   |
| CHEMBL383088 | HIV-1<br>RT | 1 | Prediction | 93.02 | -1* |
| CHEMBL319224 | HIV-1<br>RT | 1 | Training   | 99.99 | 1   |
| CHEMBL78882  | HIV-1<br>RT | 1 | Training   | 2.39  | 1   |
| CHEMBL252136 | HIV-1<br>RT | 1 | Training   | 96.46 | 1   |
| CHEMBL381888 | HIV-1<br>RT | 1 | Prediction | 18.58 | 1   |
| CHEMBL55187  | HIV-1<br>RT | 1 | Training   | 26.71 | 1   |
| CHEMBL142837 | HIV-1<br>RT | 1 | Training   | 73.24 | 1   |
| CHEMBL144744 | HIV-1<br>RT | 1 | Training   | 73.61 | -1* |
| CHEMBL438146 | HIV-1<br>RT | 1 | Prediction | 77.81 | 1   |
| CHEMBL250438 | HIV-1<br>RT | 1 | Training   | 76.18 | 1   |
| CHEMBL103386 | HIV-1<br>RT | 1 | Training   | 92.05 | 1   |
| CHEMBL205764 | HIV-1<br>RT | 1 | Training   | 95.62 | 1   |
| CHEMBL366017 | HIV-1<br>RT | 1 | Prediction | 91.94 | 1   |
| CHEMBL81227  | HIV-1<br>RT | 1 | Training   | 89.23 | 1   |
| CHEMBL79526  | HIV-1<br>RT | 1 | Training   | 57.28 | 1   |



|                |             |    |            |       |     |
|----------------|-------------|----|------------|-------|-----|
| CHEMBL171919   | HIV-1<br>RT | 1  | Training   | 27.74 | -1* |
| CHEMBL309896   | HIV-1<br>RT | 1  | Training   | 67.80 | 1   |
| CHEMBL207105   | HIV-1<br>RT | 1  | Training   | 86.04 | 1   |
| CHEMBL398891   | HIV-1<br>RT | 1  | Prediction | 93.95 | 1   |
| CHEMBL131643   | HIV-1<br>RT | 1  | Training   | 96.20 | 1   |
| CHEMBL368116   | HIV-1<br>RT | 1  | Prediction | 46.00 | 1   |
| CHEMBL377820   | HIV-1<br>RT | 1  | Training   | 82.05 | 1   |
| CHEMBL177271   | HIV-1<br>RT | 1  | Training   | 76.19 | 1   |
| CHEMBL99235    | HIV-1<br>RT | 1  | Training   | 23.59 | -1* |
| CHEMBL192231   | HIV-1<br>RT | 1  | Prediction | 98.57 | 1   |
| CHEMBL288971   | HIV-1<br>RT | 1  | Training   | 29.21 | 1   |
| CHEMBL191163   | HIV-1<br>RT | 1  | Training   | 81.51 | 1   |
| CHEMBL39999    | HIV-1<br>RT | 1  | Training   | 98.80 | -1* |
| CHEMBL189942   | HIV-1<br>RT | 1  | Prediction | 91.18 | 1   |
| CHEMBL176362   | HIV-1<br>RT | 1  | Training   | 40.95 | 1   |
| CHEMBL336237   | HIV-1<br>RT | 1  | Training   | 11.84 | 1   |
| CHEMBL175162   | HIV-1<br>RT | 1  | Training   | 79.72 | 1   |
| CHEMBL317356   | HIV-1<br>RT | 1  | Prediction | 76.88 | -1* |
| Aceclofenac    | HIV-1<br>RT | -1 | Training   | 98.03 | 1*  |
| Acetaminophen  | HIV-1<br>RT | -1 | Training   | 99.57 | -1  |
| Acetazolamide  | HIV-1<br>RT | -1 | Training   | 91.38 | -1  |
| Acetophenazine | HIV-1<br>RT | -1 | Prediction | 58.78 | -1  |
| Amantadine     | HIV-1<br>RT | -1 | Training   | 98.29 | -1  |
| Ambenonium     | HIV-1<br>RT | -1 | Training   | 53.79 | -1  |
| Amineptine     | HIV-1<br>RT | -1 | Training   | 96.72 | -1  |
| Amiodarone     | HIV-1<br>RT | -1 | Prediction | 92.26 | -1  |
| Amitriptyline  | HIV-1<br>RT | -1 | Training   | 99.48 | -1  |
| Aprobarbital   | HIV-1<br>RT | -1 | Training   | 98.69 | -1  |
| Artane         | HIV-1<br>RT | -1 | Training   | 99.09 | -1  |
| Aspirin        | HIV-1       | -1 | Prediction | 99.68 | -1  |

|                  |             |    |            |        |    |
|------------------|-------------|----|------------|--------|----|
|                  | RT          |    |            |        |    |
| Atenolol         | HIV-1<br>RT | -1 | Training   | 99.37  | -1 |
| Atropine         | HIV-1<br>RT | -1 | Training   | 86.56  | 1* |
| Baclofen         | HIV-1<br>RT | -1 | Training   | 99.15  | -1 |
| Beclomethasone   | HIV-1<br>RT | -1 | Prediction | 99.82  | -1 |
| Benzonatate      | HIV-1<br>RT | -1 | Training   | 98.89  | -1 |
| Biperiden        | HIV-1<br>RT | -1 | Training   | 98.30  | -1 |
| Bromocriptine    | HIV-1<br>RT | -1 | Training   | 97.06  | -1 |
| Bucizine         | HIV-1<br>RT | -1 | Prediction | 75.94  | 1* |
| Budesonide       | HIV-1<br>RT | -1 | Training   | 93.92  | -1 |
| Buprenorphine    | HIV-1<br>RT | -1 | Training   | 100.00 | -1 |
| Caffeine         | HIV-1<br>RT | -1 | Training   | 83.17  | -1 |
| Cantil           | HIV-1<br>RT | -1 | Prediction | 98.88  | -1 |
| Carbachol        | HIV-1<br>RT | -1 | Training   | 96.46  | -1 |
| Carbamazepine    | HIV-1<br>RT | -1 | Training   | 93.14  | -1 |
| Carisoprodol     | HIV-1<br>RT | -1 | Training   | 87.24  | -1 |
| Carvedilol       | HIV-1<br>RT | -1 | Prediction | 99.59  | -1 |
| Cefoperazone     | HIV-1<br>RT | -1 | Training   | 1.03   | -1 |
| Chloral hydrate  | HIV-1<br>RT | -1 | Training   | 99.58  | -1 |
| Chlordiazepoxide | HIV-1<br>RT | -1 | Training   | 95.98  | -1 |
| Chlorpropamide   | HIV-1<br>RT | -1 | Prediction | 88.02  | -1 |
| Chlorthalidone   | HIV-1<br>RT | -1 | Training   | 99.10  | -1 |
| Clidinium        | HIV-1<br>RT | -1 | Training   | 98.31  | -1 |
| Clobazam         | HIV-1<br>RT | -1 | Training   | 97.50  | -1 |
| Clofazimine      | HIV-1<br>RT | -1 | Prediction | 99.98  | 1* |
| Clomipramine     | HIV-1<br>RT | -1 | Training   | 96.37  | -1 |
| Clonidine        | HIV-1<br>RT | -1 | Training   | 92.56  | -1 |
| Codeine          | HIV-1<br>RT | -1 | Training   | 99.92  | -1 |
| Colchicine       | HIV-1<br>RT | -1 | Prediction | 99.54  | -1 |
| Cyclizine        | HIV-1<br>RT | -1 | Training   | 97.91  | -1 |

|                    |             |    |            |       |    |
|--------------------|-------------|----|------------|-------|----|
| Cyclosporin        | HIV-1<br>RT | -1 | Training   | 0.04  | -1 |
| Dextropropoxyphene | HIV-1<br>RT | -1 | Training   | 99.49 | -1 |
| Diazepam           | HIV-1<br>RT | -1 | Prediction | 97.26 | -1 |
| Diflucortolone     | HIV-1<br>RT | -1 | Training   | 89.92 | -1 |
| Dimercaprol        | HIV-1<br>RT | -1 | Training   | 99.83 | -1 |
| Diphenhydramine    | HIV-1<br>RT | -1 | Training   | 98.73 | -1 |
| Diphenidol         | HIV-1<br>RT | -1 | Prediction | 99.33 | -1 |
| Dobutamine         | HIV-1<br>RT | -1 | Training   | 97.79 | -1 |
| Dofetilide         | HIV-1<br>RT | -1 | Training   | 82.30 | -1 |
| Domperidone        | HIV-1<br>RT | -1 | Training   | 16.23 | 1* |
| Dopamine           | HIV-1<br>RT | -1 | Prediction | 99.69 | -1 |
| Doxazosin          | HIV-1<br>RT | -1 | Training   | 84.97 | -1 |
| Doxepin            | HIV-1<br>RT | -1 | Training   | 99.78 | -1 |
| Dronabinol         | HIV-1<br>RT | -1 | Training   | 99.54 | -1 |
| Droxicam           | HIV-1<br>RT | -1 | Prediction | 98.86 | -1 |
| Entacapone         | HIV-1<br>RT | -1 | Training   | 99.26 | -1 |
| Epinephrine        | HIV-1<br>RT | -1 | Training   | 99.60 | -1 |
| Eprosartan         | HIV-1<br>RT | -1 | Training   | 74.10 | 1* |
| Ergotamine         | HIV-1<br>RT | -1 | Prediction | 99.88 | -1 |
| Ethosuximide       | HIV-1<br>RT | -1 | Training   | 99.56 | -1 |
| Fentanyl           | HIV-1<br>RT | -1 | Training   | 96.36 | -1 |
| Fexofenadine       | HIV-1<br>RT | -1 | Training   | 97.13 | -1 |
| Flecainide         | HIV-1<br>RT | -1 | Prediction | 92.40 | -1 |
| Flunarizine        | HIV-1<br>RT | -1 | Training   | 35.23 | 1* |
| Flunisolide        | HIV-1<br>RT | -1 | Training   | 92.14 | -1 |
| Fluoxetine         | HIV-1<br>RT | -1 | Training   | 98.35 | 1* |
| Fluvoxamine        | HIV-1<br>RT | -1 | Prediction | 99.29 | -1 |
| Gabapentin         | HIV-1<br>RT | -1 | Training   | 99.55 | -1 |
| Gestodene          | HIV-1<br>RT | -1 | Training   | 98.84 | -1 |
| Glutethimide       | HIV-1       | -1 | Training   | 99.62 | -1 |

|                     |             |    |            |       |    |
|---------------------|-------------|----|------------|-------|----|
|                     | RT          |    |            |       |    |
| Glycopyrrolate      | HIV-1<br>RT | -1 | Prediction | 92.21 | -1 |
| Guanadrel           | HIV-1<br>RT | -1 | Training   | 95.25 | -1 |
| Halofantrine        | HIV-1<br>RT | -1 | Training   | 81.34 | -1 |
| Haloperidol         | HIV-1<br>RT | -1 | Training   | 45.75 | -1 |
| Halothane           | HIV-1<br>RT | -1 | Prediction | 99.30 | -1 |
| Hydromorphone       | HIV-1<br>RT | -1 | Training   | 94.51 | -1 |
| Hydroxyzine         | HIV-1<br>RT | -1 | Training   | 96.19 | -1 |
| Indapamide          | HIV-1<br>RT | -1 | Training   | 93.64 | -1 |
| Indomethacin        | HIV-1<br>RT | -1 | Prediction | 98.54 | 1* |
| Isoetharine         | HIV-1<br>RT | -1 | Training   | 98.96 | -1 |
| Isoproterenol       | HIV-1<br>RT | -1 | Training   | 99.31 | -1 |
| Isosorbide          | HIV-1<br>RT | -1 | Training   | 99.35 | -1 |
| Ketamine            | HIV-1<br>RT | -1 | Prediction | 92.76 | -1 |
| Labetalol           | HIV-1<br>RT | -1 | Training   | 97.13 | 1* |
| Lacidipine          | HIV-1<br>RT | -1 | Training   | 99.89 | -1 |
| Lamotrigine         | HIV-1<br>RT | -1 | Training   | 54.55 | -1 |
| Leuprorelin         | HIV-1<br>RT | -1 | Prediction | 13.98 | -1 |
| Levodopa            | HIV-1<br>RT | -1 | Training   | 99.33 | -1 |
| Lidocaine           | HIV-1<br>RT | -1 | Training   | 98.89 | -1 |
| Loratadine          | HIV-1<br>RT | -1 | Training   | 71.50 | 1* |
| Maprotiline         | HIV-1<br>RT | -1 | Prediction | 99.61 | -1 |
| Meclizine           | HIV-1<br>RT | -1 | Training   | 87.47 | -1 |
| Medroxyprogesterone | HIV-1<br>RT | -1 | Training   | 84.08 | -1 |
| Melfalan            | HIV-1<br>RT | -1 | Training   | 98.57 | -1 |
| Meprobamate         | HIV-1<br>RT | -1 | Prediction | 92.84 | -1 |
| Methamphetamine     | HIV-1<br>RT | -1 | Training   | 99.58 | -1 |
| Methantheline       | HIV-1<br>RT | -1 | Training   | 97.42 | -1 |
| Methocarbamol       | HIV-1<br>RT | -1 | Training   | 99.50 | -1 |
| Methoxyflurane      | HIV-1<br>RT | -1 | Prediction | 99.50 | -1 |

|                 |             |    |            |        |    |
|-----------------|-------------|----|------------|--------|----|
| Methscopolamine | HIV-1<br>RT | -1 | Training   | 85.61  | -1 |
| Methylphenidate | HIV-1<br>RT | -1 | Training   | 99.44  | -1 |
| Methysergide    | HIV-1<br>RT | -1 | Training   | 98.82  | -1 |
| Metoclopramide  | HIV-1<br>RT | -1 | Prediction | 99.26  | -1 |
| Midodrine       | HIV-1<br>RT | -1 | Training   | 99.84  | -1 |
| Mirtazapine     | HIV-1<br>RT | -1 | Training   | 54.68  | -1 |
| Modafinil       | HIV-1<br>RT | -1 | Training   | 97.96  | -1 |
| Montelukast     | HIV-1<br>RT | -1 | Prediction | 17.34  | -1 |
| Moricizine      | HIV-1<br>RT | -1 | Training   | 99.73  | -1 |
| Morphine        | HIV-1<br>RT | -1 | Training   | 99.85  | -1 |
| Nalmefene       | HIV-1<br>RT | -1 | Training   | 100.00 | -1 |
| Neostigmine     | HIV-1<br>RT | -1 | Prediction | 99.92  | -1 |
| Nifedipine      | HIV-1<br>RT | -1 | Training   | 99.94  | 1* |
| Oxycodone       | HIV-1<br>RT | -1 | Training   | 99.90  | -1 |
| Paroxetine      | HIV-1<br>RT | -1 | Training   | 97.56  | -1 |
| Pecazine        | HIV-1<br>RT | -1 | Prediction | 94.63  | -1 |
| Pergolide       | HIV-1<br>RT | -1 | Training   | 99.97  | -1 |
| Phenylbutazone  | HIV-1<br>RT | -1 | Training   | 99.31  | -1 |
| Phenytoin       | HIV-1<br>RT | -1 | Training   | 99.08  | -1 |
| Pilocarpine     | HIV-1<br>RT | -1 | Prediction | 85.34  | 1* |
| Pimozide        | HIV-1<br>RT | -1 | Training   | 3.82   | 1* |
| Pramipexole     | HIV-1<br>RT | -1 | Training   | 97.99  | -1 |
| Probenecid      | HIV-1<br>RT | -1 | Training   | 98.46  | -1 |
| Procyclidine    | HIV-1<br>RT | -1 | Prediction | 94.89  | -1 |
| Propantheline   | HIV-1<br>RT | -1 | Training   | 97.81  | -1 |
| Pseudoephedrine | HIV-1<br>RT | -1 | Training   | 99.57  | -1 |
| Pyrantel        | HIV-1<br>RT | -1 | Training   | 99.45  | -1 |
| Quinidine       | HIV-1<br>RT | -1 | Prediction | 55.87  | -1 |
| Ranitidine      | HIV-1<br>RT | -1 | Training   | 99.30  | -1 |
| Rifampin        | HIV-1       | -1 | Training   | 75.32  | -1 |

|                 |             |    |            |       |     |
|-----------------|-------------|----|------------|-------|-----|
|                 | RT          |    |            |       |     |
| Risperidone     | HIV-1<br>RT | -1 | Training   | 82.58 | 1*  |
| Ropinirole      | HIV-1<br>RT | -1 | Prediction | 98.42 | -1  |
| Salmeterol      | HIV-1<br>RT | -1 | Training   | 97.65 | -1  |
| Selegiline      | HIV-1<br>RT | -1 | Training   | 99.32 | -1  |
| Sulfinpyrazone  | HIV-1<br>RT | -1 | Training   | 96.78 | -1  |
| Tegafur         | HIV-1<br>RT | -1 | Prediction | 76.23 | -1  |
| Terpin          | HIV-1<br>RT | -1 | Training   | 98.91 | -1  |
| Tolcapone       | HIV-1<br>RT | -1 | Training   | 82.78 | 1*  |
| Tranlycypromine | HIV-1<br>RT | -1 | Training   | 99.46 | -1  |
| Trazodone       | HIV-1<br>RT | -1 | Prediction | 68.54 | -1  |
| Triamcinolone   | HIV-1<br>RT | -1 | Training   | 99.84 | -1  |
| Valproic acid   | HIV-1<br>RT | -1 | Training   | 99.65 | -1  |
| Vancomycin      | HIV-1<br>RT | -1 | Training   | 0.02  | 1*  |
| Venlafaxine     | HIV-1<br>RT | -1 | Prediction | 99.45 | -1  |
| Verapamil       | HIV-1<br>RT | -1 | Training   | 99.82 | -1  |
| Wytensin        | HIV-1<br>RT | -1 | Training   | 95.99 | -1  |
| Zafirlukast     | HIV-1<br>RT | -1 | Training   | 98.36 | -1  |
| Zileuton        | HIV-1<br>RT | -1 | Prediction | 97.00 | -1  |
| Zonisamide      | HIV-1<br>RT | -1 | Training   | 97.86 | -1  |
| CHEMBL414850    | HIV-IN      | 1  | Training   | 98.48 | 1   |
| CHEMBL196391    | HIV-IN      | 1  | Prediction | 78.64 | 1   |
| CHEMBL212412    | HIV-IN      | 1  | Training   | 16.77 | -1* |
| CHEMBL210234    | HIV-IN      | 1  | Training   | 98.77 | 1   |
| CHEMBL212213    | HIV-IN      | 1  | Training   | 92.06 | 1   |
| CHEMBL204656    | HIV-IN      | 1  | Prediction | 34.88 | 1   |
| CHEMBL206604    | HIV-IN      | 1  | Training   | 48.41 | 1   |
| CHEMBL203443    | HIV-IN      | 1  | Training   | 20.66 | 1   |
| CHEMBL371007    | HIV-IN      | 1  | Training   | 99.77 | 1   |
| CHEMBL379658    | HIV-IN      | 1  | Prediction | 98.32 | 1   |
| CHEMBL193759    | HIV-IN      | 1  | Training   | 50.59 | 1   |
| CHEMBL32865     | HIV-IN      | 1  | Training   | 99.95 | 1   |
| CHEMBL425924    | HIV-IN      | 1  | Training   | 99.81 | 1   |
| CHEMBL382965    | HIV-IN      | 1  | Prediction | 99.82 | 1   |
| CHEMBL378029    | HIV-IN      | 1  | Training   | 97.19 | 1   |

|              |        |   |            |       |   |
|--------------|--------|---|------------|-------|---|
| CHEMBL377501 | HIV-IN | 1 | Training   | 99.94 | 1 |
| CHEMBL210233 | HIV-IN | 1 | Training   | 96.87 | 1 |
| CHEMBL368084 | HIV-IN | 1 | Prediction | 83.39 | 1 |
| CHEMBL379664 | HIV-IN | 1 | Training   | 31.32 | 1 |
| CHEMBL377759 | HIV-IN | 1 | Training   | 96.19 | 1 |
| CHEMBL209872 | HIV-IN | 1 | Training   | 98.45 | 1 |
| CHEMBL212982 | HIV-IN | 1 | Prediction | 99.51 | 1 |
| CHEMBL199145 | HIV-IN | 1 | Training   | 98.83 | 1 |
| CHEMBL198160 | HIV-IN | 1 | Training   | 99.84 | 1 |
| CHEMBL212000 | HIV-IN | 1 | Training   | 61.26 | 1 |
| CHEMBL36070  | HIV-IN | 1 | Prediction | 99.61 | 1 |
| CHEMBL380588 | HIV-IN | 1 | Training   | 96.77 | 1 |
| CHEMBL209307 | HIV-IN | 1 | Training   | 99.79 | 1 |
| CHEMBL441683 | HIV-IN | 1 | Training   | 97.82 | 1 |
| CHEMBL426686 | HIV-IN | 1 | Prediction | 97.93 | 1 |
| CHEMBL270717 | HIV-IN | 1 | Training   | 29.07 | 1 |
| CHEMBL209440 | HIV-IN | 1 | Training   | 68.21 | 1 |
| CHEMBL421353 | HIV-IN | 1 | Training   | 78.93 | 1 |
| CHEMBL142072 | HIV-IN | 1 | Training   | 99.61 | 1 |
| CHEMBL208776 | HIV-IN | 1 | Training   | 97.82 | 1 |
| CHEMBL320261 | HIV-IN | 1 | Prediction | 45.81 | 1 |
| CHEMBL384912 | HIV-IN | 1 | Training   | 65.61 | 1 |
| CHEMBL409132 | HIV-IN | 1 | Training   | 15.72 | 1 |
| CHEMBL365604 | HIV-IN | 1 | Training   | 85.11 | 1 |
| CHEMBL29660  | HIV-IN | 1 | Prediction | 5.18  | 1 |
| CHEMBL209958 | HIV-IN | 1 | Training   | 80.29 | 1 |
| CHEMBL377267 | HIV-IN | 1 | Training   | 67.18 | 1 |
| CHEMBL216058 | HIV-IN | 1 | Training   | 6.40  | 1 |
| CHEMBL386055 | HIV-IN | 1 | Prediction | 59.19 | 1 |
| CHEMBL403498 | HIV-IN | 1 | Training   | 62.92 | 1 |
| CHEMBL143614 | HIV-IN | 1 | Training   | 82.15 | 1 |
| CHEMBL194833 | HIV-IN | 1 | Training   | 36.47 | 1 |
| CHEMBL343646 | HIV-IN | 1 | Prediction | 88.03 | 1 |
| CHEMBL147147 | HIV-IN | 1 | Training   | 97.68 | 1 |
| CHEMBL357909 | HIV-IN | 1 | Training   | 92.26 | 1 |
| CHEMBL19464  | HIV-IN | 1 | Training   | 88.33 | 1 |
| CHEMBL145705 | HIV-IN | 1 | Prediction | 80.96 | 1 |
| CHEMBL148241 | HIV-IN | 1 | Training   | 82.34 | 1 |
| CHEMBL145280 | HIV-IN | 1 | Training   | 97.45 | 1 |
| CHEMBL145335 | HIV-IN | 1 | Training   | 92.92 | 1 |
| CHEMBL63592  | HIV-IN | 1 | Prediction | 5.18  | 1 |
| CHEMBL147317 | HIV-IN | 1 | Training   | 83.08 | 1 |
| CHEMBL371471 | HIV-IN | 1 | Training   | 39.90 | 1 |
| CHEMBL197584 | HIV-IN | 1 | Training   | 37.65 | 1 |
| CHEMBL213852 | HIV-IN | 1 | Prediction | 64.57 | 1 |

|                |        |    |            |       |     |
|----------------|--------|----|------------|-------|-----|
| CHEMBL20342    | HIV-IN | 1  | Training   | 85.82 | 1   |
| CHEMBL146777   | HIV-IN | 1  | Training   | 81.70 | 1   |
| CHEMBL379132   | HIV-IN | 1  | Training   | 98.02 | 1   |
| CHEMBL50605    | HIV-IN | 1  | Prediction | 96.52 | 1   |
| CHEMBL198000   | HIV-IN | 1  | Prediction | 84.84 | 1   |
| CHEMBL144727   | HIV-IN | 1  | Training   | 97.64 | 1   |
| CHEMBL214371   | HIV-IN | 1  | Training   | 89.10 | 1   |
| CHEMBL1159993  | HIV-IN | 1  | Training   | 45.00 | 1   |
| CHEMBL144613   | HIV-IN | 1  | Prediction | 2.13  | -1* |
| CHEMBL213467   | HIV-IN | 1  | Training   | 80.19 | 1   |
| CHEMBL37869    | HIV-IN | 1  | Training   | 17.08 | 1   |
| CHEMBL209641   | HIV-IN | 1  | Training   | 69.54 | 1   |
| CHEMBL278545   | HIV-IN | 1  | Prediction | 93.66 | -1* |
| CHEMBL1159989  | HIV-IN | 1  | Training   | 66.65 | -1* |
| CHEMBL32711    | HIV-IN | 1  | Training   | 64.92 | -1* |
| CHEMBL108253   | HIV-IN | 1  | Training   | 32.73 | 1   |
| CHEMBL18927    | HIV-IN | 1  | Prediction | 78.25 | 1   |
| CHEMBL379974   | HIV-IN | 1  | Training   | 43.42 | -1* |
| CHEMBL1159988  | HIV-IN | 1  | Training   | 61.33 | 1   |
| CHEMBL20592    | HIV-IN | 1  | Training   | 92.14 | 1   |
| CHEMBL35842    | HIV-IN | 1  | Prediction | 91.22 | 1   |
| CHEMBL145946   | HIV-IN | 1  | Prediction | 85.91 | 1   |
| CHEMBL144118   | HIV-IN | 1  | Training   | 93.04 | 1   |
| CHEMBL358506   | HIV-IN | 1  | Training   | 79.24 | 1   |
| Aceclofenac    | HIV-IN | -1 | Training   | 97.23 | 1*  |
| Acetaminophen  | HIV-IN | -1 | Prediction | 99.40 | -1  |
| Acetazolamide  | HIV-IN | -1 | Training   | 88.22 | -1  |
| Acetophenazine | HIV-IN | -1 | Training   | 50.16 | -1  |
| Amantadine     | HIV-IN | -1 | Training   | 97.59 | -1  |
| Ambenonium     | HIV-IN | -1 | Prediction | 45.11 | -1  |
| Amineptine     | HIV-IN | -1 | Training   | 95.41 | -1  |
| Amiodarone     | HIV-IN | -1 | Training   | 89.39 | -1  |
| Amitriptyline  | HIV-IN | -1 | Training   | 99.26 | -1  |
| Aprobarbital   | HIV-IN | -1 | Prediction | 98.15 | -1  |
| Artane         | HIV-IN | -1 | Training   | 98.71 | -1  |
| Aspirin        | HIV-IN | -1 | Training   | 99.54 | -1  |
| Atenolol       | HIV-IN | -1 | Training   | 99.10 | -1  |
| Atropine       | HIV-IN | -1 | Prediction | 81.97 | -1  |
| Baclofen       | HIV-IN | -1 | Training   | 98.80 | -1  |
| Beclomethasone | HIV-IN | -1 | Training   | 99.75 | -1  |
| Benzonatate    | HIV-IN | -1 | Training   | 98.43 | -1  |
| Biperiden      | HIV-IN | -1 | Prediction | 97.61 | -1  |
| Bromocriptine  | HIV-IN | -1 | Training   | 95.89 | -1  |
| Bucizine       | HIV-IN | -1 | Training   | 69.02 | -1  |
| Budesonide     | HIV-IN | -1 | Training   | 91.60 | -1  |



|                    |        |    |            |        |    |
|--------------------|--------|----|------------|--------|----|
| Buprenorphine      | HIV-IN | -1 | Prediction | 100.00 | -1 |
| Caffeine           | HIV-IN | -1 | Training   | 77.72  | -1 |
| Cantil             | HIV-IN | -1 | Training   | 98.43  | -1 |
| Carbachol          | HIV-IN | -1 | Training   | 95.06  | -1 |
| Carbamazepine      | HIV-IN | -1 | Prediction | 90.56  | -1 |
| Carisoprodol       | HIV-IN | -1 | Training   | 82.84  | -1 |
| Carvedilol         | HIV-IN | -1 | Training   | 99.42  | -1 |
| Cefoperazone       | HIV-IN | -1 | Training   | 0.73   | -1 |
| Chloral hydrate    | HIV-IN | -1 | Prediction | 99.41  | -1 |
| Chlordiazepoxide   | HIV-IN | -1 | Training   | 94.40  | -1 |
| Chlorpropamide     | HIV-IN | -1 | Training   | 83.83  | -1 |
| Chlorthalidone     | HIV-IN | -1 | Training   | 98.73  | -1 |
| Clidinium          | HIV-IN | -1 | Prediction | 97.62  | -1 |
| Clobazam           | HIV-IN | -1 | Training   | 96.50  | -1 |
| Clofazimine        | HIV-IN | -1 | Training   | 99.97  | 1* |
| Clomipramine       | HIV-IN | -1 | Training   | 94.93  | -1 |
| Clonidine          | HIV-IN | -1 | Prediction | 89.78  | -1 |
| Codeine            | HIV-IN | -1 | Training   | 99.88  | -1 |
| Colchicine         | HIV-IN | -1 | Training   | 99.35  | -1 |
| Cyclizine          | HIV-IN | -1 | Training   | 97.07  | -1 |
| Cyclosporin        | HIV-IN | -1 | Prediction | 0.03   | -1 |
| Dextropropoxyphene | HIV-IN | -1 | Training   | 99.28  | -1 |
| Diazepam           | HIV-IN | -1 | Training   | 96.16  | -1 |
| Diflucortolone     | HIV-IN | -1 | Training   | 86.30  | -1 |
| Dimercaprol        | HIV-IN | -1 | Prediction | 99.76  | -1 |
| Diphenhydramine    | HIV-IN | -1 | Training   | 98.22  | -1 |
| Diphenidol         | HIV-IN | -1 | Training   | 99.05  | -1 |
| Dobutamine         | HIV-IN | -1 | Training   | 96.90  | 1* |
| Dofetilide         | HIV-IN | -1 | Prediction | 76.65  | -1 |
| Domperidone        | HIV-IN | -1 | Training   | 12.03  | -1 |
| Dopamine           | HIV-IN | -1 | Training   | 99.56  | -1 |
| Doxazosin          | HIV-IN | -1 | Training   | 79.96  | -1 |
| Doxepin            | HIV-IN | -1 | Prediction | 99.69  | -1 |
| Dronabinol         | HIV-IN | -1 | Training   | 99.35  | -1 |
| Droxycam           | HIV-IN | -1 | Training   | 98.39  | -1 |
| Entacapone         | HIV-IN | -1 | Training   | 98.96  | -1 |
| Epinephrine        | HIV-IN | -1 | Prediction | 99.44  | -1 |
| Eprosartan         | HIV-IN | -1 | Training   | 66.89  | 1* |
| Ergotamine         | HIV-IN | -1 | Training   | 99.83  | -1 |
| Ethosuximide       | HIV-IN | -1 | Training   | 99.38  | -1 |
| Fentanyl           | HIV-IN | -1 | Prediction | 94.93  | -1 |
| Fexofenadine       | HIV-IN | -1 | Training   | 95.98  | -1 |
| Flecainide         | HIV-IN | -1 | Training   | 89.57  | -1 |
| Flunarizine        | HIV-IN | -1 | Training   | 27.74  | -1 |
| Flunisolide        | HIV-IN | -1 | Prediction | 89.22  | -1 |

|                     |        |    |            |       |    |
|---------------------|--------|----|------------|-------|----|
| Fluoxetine          | HIV-IN | -1 | Training   | 97.67 | -1 |
| Fluvoxamine         | HIV-IN | -1 | Training   | 99.00 | -1 |
| Gabapentin          | HIV-IN | -1 | Training   | 99.36 | -1 |
| Gestodene           | HIV-IN | -1 | Prediction | 98.37 | -1 |
| Glutethimide        | HIV-IN | -1 | Training   | 99.46 | -1 |
| Glycopyrrolate      | HIV-IN | -1 | Training   | 89.31 | -1 |
| Guanadrel           | HIV-IN | -1 | Training   | 93.40 | -1 |
| Halofantrine        | HIV-IN | -1 | Prediction | 75.47 | -1 |
| Haloperidol         | HIV-IN | -1 | Training   | 37.32 | -1 |
| Halothane           | HIV-IN | -1 | Training   | 99.02 | -1 |
| Hydromorphone       | HIV-IN | -1 | Training   | 92.40 | -1 |
| Hydroxyzine         | HIV-IN | -1 | Prediction | 94.69 | -1 |
| Indapamide          | HIV-IN | -1 | Training   | 91.22 | -1 |
| Indomethacin        | HIV-IN | -1 | Training   | 97.94 | 1* |
| Isoetharine         | HIV-IN | -1 | Training   | 98.54 | -1 |
| Isoproterenol       | HIV-IN | -1 | Prediction | 99.02 | -1 |
| Isosorbide          | HIV-IN | -1 | Training   | 99.08 | -1 |
| Ketamine            | HIV-IN | -1 | Training   | 90.04 | -1 |
| Labetalol           | HIV-IN | -1 | Training   | 95.99 | 1* |
| Lacidipine          | HIV-IN | -1 | Prediction | 99.84 | -1 |
| Lamotrigine         | HIV-IN | -1 | Training   | 45.87 | -1 |
| Leuprorelin         | HIV-IN | -1 | Training   | 10.29 | -1 |
| Levodopa            | HIV-IN | -1 | Training   | 99.05 | -1 |
| Lidocaine           | HIV-IN | -1 | Prediction | 98.43 | -1 |
| Loratadine          | HIV-IN | -1 | Training   | 63.92 | -1 |
| Maprotiline         | HIV-IN | -1 | Training   | 99.44 | -1 |
| Meclizine           | HIV-IN | -1 | Training   | 83.13 | -1 |
| Medroxyprogesterone | HIV-IN | -1 | Prediction | 78.85 | -1 |
| Melfalan            | HIV-IN | -1 | Training   | 97.98 | -1 |
| Meprobamate         | HIV-IN | -1 | Training   | 90.15 | -1 |
| Methamphetamine     | HIV-IN | -1 | Training   | 99.41 | -1 |
| Methantheline       | HIV-IN | -1 | Prediction | 96.38 | -1 |
| Methocarbamol       | HIV-IN | -1 | Training   | 99.29 | -1 |
| Methoxyflurane      | HIV-IN | -1 | Training   | 99.29 | -1 |
| Methscopolamine     | HIV-IN | -1 | Training   | 80.77 | -1 |
| Methylphenidate     | HIV-IN | -1 | Prediction | 99.21 | -1 |
| Methysergide        | HIV-IN | -1 | Training   | 98.33 | -1 |
| Metoclopramide      | HIV-IN | -1 | Training   | 98.96 | -1 |
| Midodrine           | HIV-IN | -1 | Training   | 99.78 | -1 |
| Mirtazapine         | HIV-IN | -1 | Prediction | 46.00 | -1 |
| Modafinil           | HIV-IN | -1 | Training   | 97.13 | -1 |
| Montelukast         | HIV-IN | -1 | Training   | 12.90 | -1 |
| Moricizine          | HIV-IN | -1 | Training   | 99.62 | -1 |
| Morphine            | HIV-IN | -1 | Prediction | 99.78 | -1 |
| Nalmefene           | HIV-IN | -1 | Training   | 99.99 | -1 |

|                 |        |    |            |       |    |
|-----------------|--------|----|------------|-------|----|
| Neostigmine     | HIV-IN | -1 | Training   | 99.89 | -1 |
| Nifedipine      | HIV-IN | -1 | Training   | 99.92 | -1 |
| Oxycodone       | HIV-IN | -1 | Prediction | 99.86 | -1 |
| Paroxetine      | HIV-IN | -1 | Training   | 96.57 | -1 |
| Pecazine        | HIV-IN | -1 | Training   | 92.56 | -1 |
| Pergolide       | HIV-IN | -1 | Training   | 99.95 | -1 |
| Phenylbutazone  | HIV-IN | -1 | Prediction | 99.02 | -1 |
| Phenytoin       | HIV-IN | -1 | Training   | 98.70 | -1 |
| Pilocarpine     | HIV-IN | -1 | Training   | 80.43 | -1 |
| Pimozide        | HIV-IN | -1 | Training   | 2.73  | -1 |
| Pramipexole     | HIV-IN | -1 | Prediction | 97.17 | -1 |
| Probenecid      | HIV-IN | -1 | Training   | 97.84 | -1 |
| Procyclidine    | HIV-IN | -1 | Training   | 92.91 | -1 |
| Proprantheline  | HIV-IN | -1 | Training   | 96.93 | -1 |
| Pseudoephedrine | HIV-IN | -1 | Prediction | 99.39 | -1 |
| Pyrantel        | HIV-IN | -1 | Training   | 99.22 | -1 |
| Quinidine       | HIV-IN | -1 | Training   | 47.20 | -1 |
| Ranitidine      | HIV-IN | -1 | Training   | 99.01 | -1 |
| Rifampin        | HIV-IN | -1 | Prediction | 68.31 | -1 |
| Risperidone     | HIV-IN | -1 | Training   | 76.99 | 1* |
| Ropinirole      | HIV-IN | -1 | Training   | 97.77 | -1 |
| Salmeterol      | HIV-IN | -1 | Training   | 96.70 | -1 |
| Selegiline      | HIV-IN | -1 | Prediction | 99.03 | -1 |
| Sulfinpyrazone  | HIV-IN | -1 | Training   | 95.50 | -1 |
| Tegafur         | HIV-IN | -1 | Training   | 69.37 | -1 |
| Terpin          | HIV-IN | -1 | Training   | 98.47 | -1 |
| Tolcapone       | HIV-IN | -1 | Prediction | 77.25 | 1* |
| Tranlycypromine | HIV-IN | -1 | Training   | 99.23 | -1 |
| Trazodone       | HIV-IN | -1 | Training   | 60.60 | -1 |
| Triamcinolone   | HIV-IN | -1 | Training   | 99.78 | -1 |
| Valproic acid   | HIV-IN | -1 | Prediction | 99.51 | -1 |
| Vancomycin      | HIV-IN | -1 | Training   | 0.02  | 1* |
| Venlafaxine     | HIV-IN | -1 | Training   | 99.23 | -1 |
| Verapamil       | HIV-IN | -1 | Training   | 99.75 | -1 |
| Wytensin        | HIV-IN | -1 | Prediction | 94.41 | -1 |
| Zafirlukast     | HIV-IN | -1 | Training   | 97.70 | -1 |
| Zileuton        | HIV-IN | -1 | Training   | 95.81 | -1 |
| Zonisamide      | HIV-IN | -1 | Training   | 97.00 | -1 |

Compounds appear exactly in the same order as in **Supplementary Information 1** file.

**A<sub>HIV-IP</sub>**: is referred to the observed anti-HIV activity through the inhibition of a specific protein.

**Name or Code**: in the specific case of codes, these are represented by numbers belonging to ChEMBL Database.

**PAHIV:** the code used for the different proteins associated to HIV.

**Prob.:** is the predicted probability (by the mt-QSAR-LDA model) to belong to the observed anti-HIV activity (active or inactive according to the variable  $A_{\text{HIV-IP}}$ ).

Compounds with **Prob.**<50% are incorrectly classified by the mt-QSAR-LDA model.

**Pred- $A_{\text{HIV-IP}}$ :** is the predicted activity (by the mt-QSAR-ANN model) to belong to the observed anti-HIV activity (active or inactive according to the variable  $A_{\text{HIV-IP}}$ ).

\* Compounds incorrectly classified by the mt-QSAR-ANN model.
